# Supplementary material for: Burden of chronic kidney disease on the African continent: a systematic review and meta-analysis
Source: Springer Nature journal article supplement (doi:10.1186/s12882-018-0930-5), 2018-06-01
Supplement: MOESM1 [file 15812360]

## **SUPPLEMENTARY MATERIAL**

### **Item 1: Search strategies**

### **Item 2: Quality appraisal of included studies**

### **Item 3: Supplementary tables**

- Table S1: Summary of the risk of bias in the included studies
- Table S2: Characteristics of the 98 studies included in this systematic review
- Table S3: Summary statistics for prevalence of CKD stages 1-5 in general populations
- Table S4: Summary statistics for prevalence of CKD stages 3-5 in general populations
- Table S5: Summary statistics for prevalence of CKD stages 1-5 in high-risk populations
- Table S6: Summary statistics for prevalence of CKD stages 3-5 in high-risk populations

### **Item 4: Supplementary figures**

- Figure S1: Prevalence of CKD in the general population of Africa according to eGFR equation
- Figure S2: Prevalence of CKD stages 3 to 5 in the general population of Africa according to eGFR equation
- Figure S3: Prevalence of CKD in HIV-positive individuals living in Africa
- Figure S4: Prevalence of CKD in hypertensive individuals living in Africa
- Figure S5: Prevalence of CKD in people with diabetes mellitus living in Africa
- Figure S6: Prevalence of CKD stages 3 to 5 in HIV-positive individuals living in Africa
- Figure S7: Prevalence of CKD stages 3 to 5 in hypertensive individuals living in Africa
- Figure S8: Prevalence of CKD stages 3 to 5 in people with diabetes mellitus living in Africa

## **Item 1: Search strategies**

### **The African Search Filter**

("Africa"[MeSH] OR Africa\*[tw] OR Algeria[tw] OR Angola[tw] OR Benin[tw] OR Botswana[tw] OR "Burkina Faso"[tw] OR Burundi[tw] OR Cameroon[tw] OR "Canary Islands"[tw] OR "Cape Verde"[tw] OR "Central African Republic"[tw] OR Chad[tw] OR Comoros[tw] OR Congo[tw] OR "Democratic Republic of Congo"[tw] OR Djibouti[tw] OR Egypt[tw] OR "Equatorial Guinea"[tw] OR Eritrea[tw] OR Ethiopia[tw] OR Gabon[tw] OR Gambia[tw] OR Ghana[tw] OR Guinea[tw] OR "Guinea Bissau"[tw] OR "Ivory Coast"[tw] OR "Cote d'Ivoire"[tw] OR Jamahiriya[tw] OR Jamahiriya[tw] OR Kenya[tw] OR Lesotho[tw] OR Liberia[tw] OR Libya[tw] OR Libya[tw] OR Madagascar[tw] OR Malawi[tw] OR Mali[tw] OR Mauritania[tw] OR Mauritius[tw] OR Mayotte[tw] OR Morocco[tw] OR Mozambique[tw] OR Mozambique[tw] OR Namibia[tw] OR Niger[tw] OR Nigeria[tw] OR Principe[tw] OR Reunion[tw] OR Rwanda[tw] OR "Sao Tome"[tw] OR Senegal[tw] OR Seychelles[tw] OR "Sierra Leone"[tw] OR Somalia[tw] OR "South Africa"[tw] OR "St Helena"[tw] OR Sudan[tw] OR Swaziland[tw] OR Tanzania[tw] OR Togo[tw] OR Tunisia[tw] OR Uganda[tw] OR "Western Sahara"[tw] OR Zaire[tw] OR Zambia[tw] OR Zimbabwe[tw] OR "Central African"[tw] OR "West Africa"[tw] OR "West African"[tw] OR "Western Africa"[tw] OR "Western African"[tw] OR "East Africa"[tw] OR "East African"[tw] OR "Eastern Africa"[tw] OR "Eastern African"[tw] OR "North Africa"[tw] OR "North African"[tw] OR "Northern Africa"[tw] OR "Northern African"[tw] OR "South African"[tw] OR "Southern Africa"[tw] OR "Southern African"[tw] OR "sub Saharan Africa"[tw] OR "sub Saharan African"[tw] OR "sub-Saharan Africa"[tw] OR "sub-Saharan African"[tw]) NOT ("guinea pig"[tw] OR "guinea pigs"[tw] OR "aspergillums Niger"[tw])

### **PubMed search strategy for systematic review of burden of chronic kidney disease on the African continent**

("Prevalence"[Mesh] OR "Epidemiology"[Mesh] OR Prevalence[tiab] OR epidemiology[tiab])

AND ("Kidney Diseases"[Mesh] OR "Renal Insufficiency, Chronic"[Mesh] OR "Proteinuria"[Mesh] OR "Albuminuria"[Mesh] OR Chronic Kidney Disease[tiab] OR Kidney Disease[tiab] OR Nephropathy[tiab] OR Renal Insufficiency[tiab] OR Renal Impairment[tiab] OR Impaired Kidney Function[tiab] OR ckd[tiab] OR crd[tiab] OR eskd[tiab] OR End Stage Renal Disease[tiab] OR Kidney Disease[tiab] OR Dialysis[tiab] OR Chronic Renal Failure[tiab] OR Renal Failure[tiab] OR Proteinuria[tiab] OR albuminuria[tiab])

AND ("Africa"[Mesh] OR Africa[tiab] OR "Africa South of the Sahara"[Mesh] OR "Africa, Western"[Mesh] OR "Africa, Southern"[Mesh] OR "Africa, Northern"[Mesh] OR "Africa, Eastern"[Mesh] OR "Africa, Central"[Mesh] OR Angola[tiab] OR Benin[tiab] OR Botswana[tiab] OR Burkina Faso[tiab] OR Upper Volta[tiab] OR Burundi[tiab] OR Urundi[tiab] OR Cameroon[tiab] OR Cameroons[tiab] OR Cape Verde[tiab] OR Central African Republic[tiab] OR Chad[tiab] OR Comoros[tiab] OR Comoro Islands[tiab] OR Comores[tiab] OR Mayotte[tiab] OR Congo[tiab] OR Zaire[tiab] OR Cote d'Ivoire[tiab] OR Ivory Coast[tiab] OR Democratic Republic of the Congo[tiab] OR Djibouti[tiab] OR French Somaliland[tiab] OR Eritrea[tiab] OR Ethiopia[tiab] OR Gabon[tiab] OR Gabonese Republic[tiab] OR Gambia[tiab] OR Ghana[tiab] OR Gold Coast[tiab] OR Guinea[tiab] OR Kenya[tiab] OR Lesotho[tiab] OR Basutoland OR Liberia[tiab] OR Madagascar[tiab] OR Malagasy Republic[tiab] OR Malawi[tiab] OR Nyasaland[tiab] OR Mali[tiab] OR Mauritania[tiab] OR Mauritius[tiab] OR Mozambique[tiab] OR Namibia[tiab] OR Niger OR Nigeria[tiab] OR Rwanda[tiab] OR Sao Tome[tiab] OR Seychelles[tiab] OR Senegal[tiab] OR Sierra Leone[tiab] OR Somalia[tiab] OR South Africa[tiab] OR Sudan[tiab] OR Swaziland[tiab] OR Tanzania[tiab] OR Togo[tiab] OR Togolese Republic[tiab] OR Uganda[tiab] OR Zambia[tiab] OR Zimbabwe[tiab] OR Rhodesia[tiab] OR Algeria[tiab] OR Egypt[tiab] OR Lybia[tiab] OR Morocco[tiab] OR Tunisia[tiab] OR Western Sahara[tiab])

Filters: Publication date from 2000/01/01 to 2016/12/31; Humans

## Embase search strategy for systematic review of burden of chronic kidney disease on the African continent

'prevalence'/exp OR 'epidemiology'/exp OR prevalence:ab,ti OR epidemiology:ab,ti

AND ('chronic kidney disease'/exp OR 'chronic kidney failure'/exp OR 'end stage renal disease'/exp OR 'proteinuria'/exp OR 'chronic kidney disease':ab,ti OR 'nephropathy':ab,ti OR 'renal insufficiency':ab,ti OR 'renal impairment':ab,ti OR 'impaired kidney function':ab,ti OR ckd:ab,ti OR crd:ab,ti OR eskd:ab,ti OR 'end stage renal disease':ab,ti OR 'kidney disease':ab,ti OR dialysis:ab,ti OR 'chronic renal failure':ab,ti OR 'renal failure':ab,ti OR proteinuria:ab,ti OR albuminuria:ab,ti)

AND ('africa'/exp OR 'north africa'/exp OR 'africa south of the sahara'/exp OR 'sub saharan africa':ab,ti OR 'subsaharan africa':ab,ti OR angola:ab,ti OR benin:ab,ti OR botswana:ab,ti OR 'burkina faso':ab,ti OR 'upper volta':ab,ti OR burundi:ab,ti OR urundi:ab,ti OR cameroon:ab,ti OR cameroons:ab,ti OR 'cape verde':ab,ti OR 'central african republic':ab,ti OR chad:ab,ti OR comoros:ab,ti OR 'comoro islands':ab,ti OR comores:ab,ti OR mayotte:ab,ti OR 'congo'/exp OR 'ivory coast':ab,ti OR 'democratic republic of the congo':ab,ti OR djibouti:ab,ti OR 'french somaliland':ab,ti OR eritrea:ab,ti OR ethiopia:ab,ti OR gabon:ab,ti OR 'gabonese republic':ab,ti OR gambia:ab,ti OR ghana:ab,ti OR 'gold coast':ab,ti OR guinea:ab,ti OR kenya:ab,ti OR lesotho:ab,ti OR basutoland:ab,ti OR liberia:ab,ti OR madagascar:ab,ti OR 'malagasy republic':ab,ti OR malawi:ab,ti OR nyasaland:ab,ti OR mali:ab,ti OR mauritania:ab,ti OR mauritius:ab,ti OR mozambique:ab,ti OR namibia:ab,ti OR niger:ab,ti OR nigeria:ab,ti OR rwanda:ab,ti OR 'sao tome':ab,ti OR seychelles:ab,ti OR senegal:ab,ti OR 'sierra leone':ab,ti OR somalia:ab,ti OR 'south africa':ab,ti OR sudan:ab,ti OR swaziland:ab,ti OR tanzania:ab,ti OR togo:ab,ti OR 'togolese republic':ab,ti OR uganda:ab,ti OR zambia:ab,ti OR zimbabwe:ab,ti OR rhodesia:ab,ti OR algeria:ab,ti OR egypt:ab,ti OR lybia:ab,ti OR morocco:ab,ti OR tunisia:ab,ti OR 'western sahara':ab,ti)

Filters: Publication date from 2000/01/01 to 2016/12/31; Humans

## Item 2: Quality appraisal of included studies

### Quality assessment criteria for prevalence studies

| Items                                                                                                                     | Quality score    |
|---------------------------------------------------------------------------------------------------------------------------|------------------|
| <b>External validity</b>                                                                                                  |                  |
| 1. Was the study's target population a close representation of the national population in relation to relevant variables? | (1 point)        |
| 2. Was the sampling frame a true or close representation of the target population?                                        | (1 point)        |
| 3. Was some form of random selection used to select the sample, OR was a census undertaken?                               | (1 point)        |
| 4. Was the likelihood of nonresponse bias minimal?                                                                        | (1 point)        |
|                                                                                                                           | Total (4 points) |
| <b>Internal validity</b>                                                                                                  |                  |
| 5. Were data collected directly from the subjects (as opposed to a proxy)?                                                | (1 point)        |
| 6. Was an acceptable case definition used in the study?                                                                   | (1 point)        |
| 7. Was the study instrument that measured the parameter of interest shown to have validity and reliability?               | (1 point)        |
| 8. Was the same mode of data collection used for all subjects?                                                            | (1 point)        |
| 9. Was the length of the shortest prevalence period for the parameter of interest appropriate?                            | (1 point)        |
| 10. Were the numerator(s) and denominator(s) for the parameter of interest appropriate?                                   | (1 point)        |
|                                                                                                                           | Total (6 points) |

Source: Hoy et al [2].

#### **Methodological quality:**

High quality: score > 8

Moderate quality: score 6-8

Low quality: score 0-5

### Item 3: Supplementary tables

**Table S1: Summary of the risk of bias in the included studies**

| Author Year             | Country               | External validity |                |                |                | Internal validity |                |                |                |                |                 | Score | Quality  |
|-------------------------|-----------------------|-------------------|----------------|----------------|----------------|-------------------|----------------|----------------|----------------|----------------|-----------------|-------|----------|
|                         |                       | Risk of bias 1    | Risk of bias 2 | Risk of bias 3 | Risk of bias 4 | Risk of bias 5    | Risk of bias 6 | Risk of bias 7 | Risk of bias 8 | Risk of bias 9 | Risk of bias 10 |       |          |
| Adebamowo S N 2016      | Nigeria, Ghana, Kenya | 0                 | 1              | 0              | 1              | 1                 | 1              | 1              | 1              | 1              | 1               | 8     | moderate |
| Adedeji T A 2015        | Nigeria               | 0                 | 1              | 0              | NCS            | 1                 | 1              | 1              | 1              | 1              | 1               | 7     | moderate |
| Afolabi M O 2009        | Nigeria               | 0                 | 1              | 0              | NCS            | 1                 | 1              | 1              | 1              | 1              | 1               | 7     | moderate |
| Akwanalo C A 2014       | Kenya                 | 0                 | 1              | 0              | 1              | 1                 | 1              | 1              | 1              | 1              | 1               | 8     | moderate |
| Anyabolu E 2016         | Nigeria               | 0                 | 1              | 0              | 1              | 1                 | 1              | 1              | 1              | 1              | 1               | 8     | moderate |
| Awobusuyi J O 2011      | Nigeria               | 0                 | 1              | 0              | 1              | 1                 | 1              | 1              | 1              | 1              | 1               | 8     | moderate |
| Ayokunle D S 2015       | Nigeria               | 0                 | 1              | 0              | 1              | 1                 | 1              | 1              | 1              | 1              | 1               | 8     | moderate |
| Bakshi F 2014           | Tanzania              | 0                 | 1              | 0              | NCS            | 1                 | 1              | 1              | 1              | 1              | 1               | 7     | moderate |
| Benghanem Gharbi M 2016 | Morocco               | 0                 | 1              | 1              | 1              | 1                 | 1              | 1              | 1              | 1              | 1               | 9     | high     |
| Booyesen H L 2016       | South Africa          | 0                 | 1              | 1              | 1              | 1                 | 1              | 1              | 1              | 1              | 1               | 9     | high     |
| Borkum M 2014           | South Africa          | 0                 | 1              | 0              | 0              | 1                 | 1              | 1              | 1              | 1              | 1               | 7     | moderate |
| Brenyah R C 2013        | Ghana                 | 0                 | 1              | 1              | 1              | 1                 | 1              | 1              | 1              | 1              | 1               | 9     | high     |
| Cailhol J 2011          | Burundi               | 0                 | 1              | 0              | 1              | 1                 | 1              | 1              | 1              | 1              | 1               | 8     | moderate |
| Egbi O G 2014           | Nigeria               | 0                 | 1              | 0              | NCS            | 1                 | 1              | 1              | 1              | 1              | 1               | 7     | moderate |
| Ekat M H 2013           | Congo                 | 0                 | 1              | 0              | 0              | 1                 | 1              | 1              | 1              | 1              | 1               | 7     | moderate |
| El-Tayeb M 2010         | Egypt                 | 0                 | 1              | 1              | 1              | 1                 | 1              | 1              | 1              | 1              | 1               | 9     | high     |
| Emem C P 2008           | Nigeria               | 0                 | 1              | 0              | NCS            | 1                 | 1              | 1              | 1              | 1              | 1               | 7     | moderate |
| Ene-Iordache B 2016     | Nigeria               | 0                 | 1              | 0              | NCS            | 1                 | 1              | 1              | 1              | 1              | 1               | 7     | moderate |
| Ephraim R K 2015        | Ghana                 | 0                 | 1              | 0              | 1              | 1                 | 1              | 1              | 1              | 1              | 1               | 8     | moderate |
| Fana G T 2011           | Zimbabwe              | 0                 | 1              | 0              | NCS            | 1                 | 1              | 1              | 1              | 1              | 1               | 7     | moderate |
| Feteh V F 2016          | Cameroon              | 0                 | 1              | 0              | 1              | 1                 | 1              | 1              | 1              | 1              | 1               | 8     | moderate |
| Fiseha T 2014           | Ethiopia              | 0                 | 1              | 1              | NCS            | 1                 | 1              | 1              | 1              | 1              | 1               | 8     | moderate |
| Glaser N 2013           | Malawi                | 0                 | 1              | 0              | 1              | 1                 | 1              | 1              | 1              | 1              | 1               | 8     | moderate |
| Janmohamed M N 2013     | Tanzania              | 0                 | 1              | 0              | 1              | 1                 | 1              | 1              | 1              | 1              | 1               | 8     | moderate |

|                      |              |   |   |   |     |   |   |   |   |   |   |   |          |
|----------------------|--------------|---|---|---|-----|---|---|---|---|---|---|---|----------|
| Jao J 2011           | 7 countries  | 0 | 1 | 0 | NCS | 1 | 1 | 1 | 1 | 1 | 1 | 7 | moderate |
| Kamkuemah M 2015     | South Africa | 0 | 1 | 0 | 1   | 1 | 1 | 1 | 1 | 1 | 1 | 8 | moderate |
| Kaze F 2013          | Cameroon     | 0 | 1 | 0 | NCS | 1 | 1 | 1 | 1 | 1 | 1 | 7 | moderate |
| Kaze F, 2015 (500)   | Cameroon     | 0 | 1 | 1 | 1   | 1 | 1 | 1 | 1 | 1 | 1 | 9 | high     |
| Kaze F, 2015 (439)   | Cameroon     | 0 | 1 | 1 | 1   | 1 | 1 | 1 | 1 | 1 | 1 | 9 | high     |
| Kaze F, 2016         | Cameroon     | 0 | 1 | 0 | 1   | 1 | 1 | 1 | 1 | 1 | 1 | 8 | moderate |
| Keegan R 2011        | Ghana        | 0 | 1 | 0 | NCS | 1 | 1 | 1 | 1 | 1 | 1 | 7 | moderate |
| Longo A L 2012       | DR Congo     | 0 | 1 | 0 | NCS | 1 | 1 | 1 | 1 | 1 | 1 | 7 | moderate |
| Lucas G M 2010       | Uganda       | 0 | 1 | 1 | 1   | 1 | 1 | 1 | 1 | 1 | 1 | 9 | high     |
| Lunyera J 2016       | Uganda       | 0 | 1 | 0 | NCS | 1 | 1 | 1 | 1 | 1 | 1 | 7 | moderate |
| Mafundikwa A 2007    | Zimbabwe     | 0 | 1 | 0 | NCS | 1 | 1 | 1 | 1 | 1 | 1 | 7 | moderate |
| Makusidi M A 2013    | Nigeria      | 0 | 1 | 1 | 1   | 1 | 1 | 1 | 1 | 1 | 1 | 8 | moderate |
| Masimango M I 2014   | DR Congo     | 0 | 1 | 0 | NCS | 1 | 1 | 1 | 1 | 1 | 1 | 7 | moderate |
| Matsha T E 2013      | South Africa | 0 | 1 | 1 | 1   | 1 | 1 | 1 | 1 | 1 | 1 | 9 | high     |
| Motala A A 2001      | South Africa | 0 | 1 | 0 | NCS | 0 | 1 | 0 | 1 | 1 | 1 | 5 | low      |
| Msango L 2011        | Tanzania     | 0 | 1 | 0 | 1   | 1 | 1 | 1 | 1 | 1 | 1 | 8 | moderate |
| Mulenga L B 2008     | Zambia       | 0 | 1 | 0 | 1   | 1 | 1 | 1 | 1 | 1 | 1 | 8 | moderate |
| Nelissen H E 2014    | Nigeria      | 0 | 1 | 1 | NCS | 1 | 1 | 1 | 1 | 1 | 1 | 7 | moderate |
| Ngassa Piotie P 2015 | South Africa | 0 | 1 | 0 | NCS | 1 | 1 | 1 | 1 | 1 | 1 | 7 | moderate |
| Obirikorang C 2014   | Ghana        | 0 | 1 | 0 | NCS | 1 | 1 | 1 | 1 | 1 | 1 | 7 | moderate |
| Odenigbo C 2014      | Nigeria      | 0 | 1 | 0 | 1   | 1 | 1 | 1 | 1 | 1 | 1 | 8 | moderate |
| Odongo P 2015        | Uganda       | 0 | 1 | 0 | 1   | 1 | 1 | 1 | 1 | 1 | 1 | 8 | moderate |
| Okafor U H 2016      | Nigeria      | 0 | 1 | 0 | NCS | 1 | 1 | 1 | 1 | 1 | 1 | 7 | moderate |
| Oladapo O O 2012     | Nigeria      | 0 | 1 | 0 | NCS | 1 | 1 | 0 | 1 | 1 | 1 | 7 | moderate |
| Olanrewaju T O 2010  | Nigeria      | 0 | 1 | 0 | 0   | 1 | 1 | 1 | 1 | 1 | 1 | 7 | moderate |
| Onodugo O D 2013     | Nigeria      | 0 | 1 | 0 | 0   | 1 | 1 | 1 | 1 | 1 | 1 | 7 | moderate |
| Osafo C 2011         | Ghana        | 0 | 1 | 0 | 0   | 1 | 1 | 1 | 1 | 1 | 1 | 7 | moderate |
| Peck R 2016          | Tanzania     | 0 | 1 | 1 | 1   | 1 | 1 | 1 | 1 | 1 | 1 | 9 | high     |

|                         |              |   |   |   |     |   |   |   |   |   |   |    |          |
|-------------------------|--------------|---|---|---|-----|---|---|---|---|---|---|----|----------|
| Peck R N 2014           | Tanzania     | 0 | 1 | 0 | 1   | 1 | 1 | 1 | 1 | 1 | 1 | 8  | moderate |
| Peer N 2008             | South Africa | 0 | 1 | 0 | 0   | 1 | 1 | 1 | 1 | 1 | 1 | 7  | moderate |
| Pruijm M T 2008         | Seychelles   | 1 | 1 | 1 | 1   | 1 | 1 | 1 | 1 | 1 | 1 | 10 | high     |
| Rasmussen J B 2016      | Zambia       | 0 | 1 | 0 | 0   | 1 | 1 | 1 | 1 | 1 | 1 | 7  | moderate |
| Salako B L 2007         | Nigeria      | 0 | 1 | 0 | 0   | 1 | 1 | 1 | 1 | 1 | 1 | 7  | moderate |
| Sarfo F S 2013          | Ghana        | 0 | 1 | 0 | 1   | 1 | 1 | 1 | 1 | 1 | 1 | 8  | moderate |
| Seck S M 2013           | Senegal      | 0 | 1 | 1 | 1   | 1 | 1 | 1 | 1 | 1 | 1 | 9  | high     |
| Seck S M 2014           | Senegal      | 0 | 1 | 1 | 1   | 1 | 1 | 1 | 1 | 1 | 1 | 9  | high     |
| Stanifer J W 2015       | Tanzania     | 0 | 1 | 1 | 1   | 1 | 1 | 1 | 1 | 1 | 1 | 9  | high     |
| Struik G M 2011         | Malawi       | 0 | 1 | 0 | 1   | 1 | 1 | 1 | 1 | 1 | 1 | 8  | moderate |
| Sumaili E K 2009        | DR Congo     | 0 | 1 | 1 | 1   | 1 | 1 | 1 | 1 | 1 | 1 | 9  | high     |
| Sumaili E K 2009        | DR Congo     | 0 | 1 | 0 | 1   | 1 | 1 | 1 | 1 | 1 | 1 | 8  | moderate |
| Wensink G E 2015        | South Africa | 0 | 1 | 1 | NCS | 1 | 1 | 1 | 1 | 1 | 1 | 8  | moderate |
| Wools-Kaloustian K 2007 | Kenya        | 0 | 1 | 0 | NCS | 1 | 1 | 1 | 1 | 1 | 1 | 7  | moderate |
| Wyatt C M 2011          | Rwanda       | 0 | 1 | 0 | NCS | 1 | 1 | 1 | 1 | 1 | 1 | 7  | moderate |
| Wachukwu C M 2015       | Nigeria      | 0 | 1 | 0 | NCS | 1 | 1 | 1 | 1 | 1 | 1 | 7  | moderate |
| Oluyombo R 2013         | Nigeria      | 0 | 1 | 1 | NCS | 1 | 1 | 1 | 1 | 1 | 1 | 7  | moderate |
| Ekat E 2012             | Congo        | 0 | 1 | 0 | NCS | 1 | 1 | 1 | 1 | 1 | 1 | 7  | moderate |
| Makulo R Jr 2010        | DR Congo     | 0 | 1 | 1 | NCS | 1 | 1 | 1 | 1 | 1 | 1 | 8  | moderate |
| Ayodele O E 2007        | Nigeria      | 0 | 1 | 0 | NCS | 1 | 1 | 1 | 1 | 1 | 1 | 7  | moderate |
| Ayodele O E 2011        | Nigeria      | 0 | 1 | 0 | NCS | 1 | 1 | 1 | 1 | 1 | 1 | 7  | moderate |
| Machingura P I 2016     | Zimbabwe     | 0 | 1 | 0 | 1   | 1 | 1 | 1 | 1 | 1 | 1 | 8  | moderate |
| Akpan E E 2016          | Nigeria      | 0 | 1 | 0 | NCS | 1 | 1 | 1 | 1 | 1 | 1 | 7  | moderate |
| Divala O H 2016         | Malawi       | 0 | 1 | 0 | NCS | 1 | 1 | 1 | 1 | 1 | 1 | 7  | moderate |
| Glaser N 2016           | Malawi       | 0 | 1 | 0 | 1   | 1 | 1 | 1 | 1 | 1 | 1 | 8  | moderate |
| Laurence E C 2016       | South Africa | 0 | 1 | 1 | NCS | 1 | 1 | 1 | 1 | 1 | 1 | 8  | moderate |
| Satman 2016             | South Africa | 0 | 1 | 1 | NCS | 1 | 1 | 1 | 1 | 1 | 1 | 8  | moderate |
| Mekuria Y 2016          | Ethiopia     | 0 | 1 | 0 | NCS | 1 | 1 | 1 | 1 | 1 | 1 | 7  | moderate |
| Okafor U H 2016         | Nigeria      | 0 | 1 | 0 | 1   | 1 | 1 | 1 | 1 | 1 | 1 | 8  | moderate |
| Stanifer J W 2016       | Tanzania     | 0 | 1 | 1 | 1   | 1 | 1 | 1 | 1 | 1 | 1 | 9  | high     |

|                            |                     |   |   |   |     |   |   |   |   |   |   |   |          |
|----------------------------|---------------------|---|---|---|-----|---|---|---|---|---|---|---|----------|
| Fouad M 2016               | Egypt               | 0 | 1 | 0 | 1   | 1 | 1 | 1 | 1 | 1 | 1 | 8 | moderate |
| Ogola 2016                 | Kenya               | 0 | 1 | 0 | NCS | 1 | 1 | 1 | 1 | 1 | 1 | 7 | moderate |
| Owiredu W K 2013           | Ghana               | 0 | 1 | 0 | NCS | 1 | 1 | 1 | 1 | 1 | 1 | 7 | moderate |
| Beheiry H 2015             | Sudan               | 0 | 1 | 1 | NCS | 1 | 1 | 1 | 1 | 1 | 1 | 8 | moderate |
| Bolarinwa RA 2012          | Nigeria             | 0 | 1 | 0 | NCS | 1 | 1 | 1 | 1 | 1 | 1 | 7 | moderate |
| Abdu 2011                  | Nigeria             | 0 | 1 | 0 | NCS | 1 | 1 | 1 | 1 | 1 | 1 | 7 | moderate |
| Cohen D B 2010             | Malawi              | 0 | 1 | 0 | 1   | 1 | 1 | 1 | 1 | 1 | 1 | 8 | moderate |
| Ebong C E 2007             | Cameroon            | 0 | 1 | 0 | NCS | 1 | 1 | 1 | 1 | 1 | 1 | 7 | moderate |
| Mpondo B C 2014            | Tanzania            | 0 | 1 | 0 | 1   | 1 | 1 | 1 | 1 | 1 | 1 | 8 | moderate |
| Sumaili E K 2008           | R Congo             | 0 | 1 | 0 | 1   | 1 | 1 | 1 | 1 | 1 | 1 | 8 | moderate |
| Stohr W 2008               | Zimbabwe,<br>Uganda | 0 | 1 | 1 | 1   | 1 | 1 | 1 | 1 | 1 | 1 | 9 | high     |
| Addo J 2009                | Ghana               | 0 | 1 | 0 | 1   | 1 | 1 | 1 | 1 | 1 | 1 | 8 | moderate |
| Eastwood J B 2010          | Ghana               | 0 | 1 | 1 | 1   | 1 | 1 | 1 | 1 | 1 | 1 | 9 | high     |
| Abu-Aisha H 2009           | Sudan               | 0 | 1 | 1 | 1   | 1 | 1 | 1 | 1 | 1 | 1 | 9 | high     |
| Fatiu A 2011               | Nigeria             | 0 | 1 | 0 | NCS | 1 | 1 | 1 | 1 | 1 | 1 | 7 | moderate |
| Ulasi II 2013              | Nigeria             | 0 | 1 | 1 | 1   | 1 | 1 | 1 | 1 | 1 | 1 | 9 | high     |
| Wondifraw<br>Baynes H 2016 | Ethiopia            | 0 | 1 | 0 | 0   | 0 | 1 | 1 | 0 | 0 | 1 | 4 | low      |

**NCS: Not clearly stated**



**Table S2: Characteristics of the 98 studies included in this systematic review**

| Study             | Country               | Study Setting | Study type | Sampling          | Size  | Response rate | Population                             | Mean age/ range | Female (%) | Rural (%) | Proteinuria measurement | eGFR equation | Creatinine assessment method | HTN (%) | DM (%) | HIV (%) |
|-------------------|-----------------------|---------------|------------|-------------------|-------|---------------|----------------------------------------|-----------------|------------|-----------|-------------------------|---------------|------------------------------|---------|--------|---------|
| Adebamowo 2016    | Nigeria, Ghana, Kenya | outpatient    | C/S        | consecutive       | 4815  | 96            | Diabetics, healthy controls            | 55              | 60         | 0         | -                       | MDRD          | Jaffe method                 | 68.3    | 100    | NR      |
| Adedeji 2015      | Nigeria               | outpatient    | C/S        | consecutive       | 183   | NR            | HIV naïve                              | 37.9            | 57.4       | 0         |                         | MDRD          | Jaffe method                 | 0       | 0      | 100     |
| Afolabi 2009      | Nigeria               | outpatient    | C/S        | consecutive       | 250   | NR            | Family Practice patients               | 50.5            | 72.8       | 0         | spot urine ACR          | MDRD          | Jaffe method                 | NR      | 6      | NR      |
| Akwanalo 2014     | Kenya                 | community     | C/S        | consecutive       | 300   | 100           | Hypertensive, healthy controls         | 58              | 65         | 100       | -                       | MDRD          | NR                           | 100     | 56     | NR      |
| Anyabolu 2016     | Nigeria               | outpatient    | C/S        | consecutive       | 511   | 100           | HIV naïve, healthy controls            | 38.8            | 72         | NR        | 24-h proteinuria        | MDRD          | NR                           | NR      | NR     | 100     |
| Awobusuyi 2011    | Nigeria               | community     | C/S        | random            | 326   | 100           | general population                     | 43.5            | 58         | 0         | urine dipstick test     | CG            | Jaffe method                 | 46.6    | 0.9    | NR      |
| Ayodele 2011      | Nigeria               | community     | C/S        | consecutive       | 586   | NR            | general population                     | 42.4            | NR         | 0         | urine dipstick test     | -             | -                            | 25.9    | 4.1    | NR      |
| Ayokunle 2015     | Nigeria               | outpatient    | C/S        | consecutive       | 335   | 100           | HIV naïve, healthy controls            | 40.3            | 56         | NR        | spot urine ACR          | MDRD          | Jaffe method                 | NR      | NR     | 100     |
| Bakshi 2014       | Tanzania              | outpatient    | C/S        | consecutive       | 49    | NR            | healthy adults                         | 41              | 75.5       | NR        | -                       | MDRD          | NR                           | 0       | 0      | 0       |
| Benghanem 2016    | Morocco               | community     | C/S        | stratified random | 10524 | 85            | general population                     | 26-70           | 51.3       | NR        | urine dipstick test     | MDRD          | Jaffe method                 | 21.9    | 16.8   | NR      |
| Booyesen 2016     | South Africa          | community     | C/S        | random            | 1189  | 97            | general population                     | 44.1            | 65.1       | NR        | -                       | MDRD          | Jaffe method                 | 45      | 25.2   | NR      |
| Borkum 2014       | South Africa          | outpatient    | C/S        | consecutive       | 64    | NR            | HIV naïve                              | 33              | 77         | NR        | spot urine ACR          | MDRD          | NR                           | NR      | NR     | 100     |
| Brenyah 2013      | Ghana                 | outpatient    | C/S        | random            | 341   | 100           | Diabetics                              | 54.9            | NR         | 0         | urine dipstick test     | -             | -                            | NR      | NR     | NR      |
| Cailhol 2011      | Burundi               | outpatient    | C/S        | consecutive       | 245   | 82            | HIV                                    | 40.1            | 70.3       | NR        | urine dipstick test     | CG, MDRD      | NR                           | 2.7     | 2      | 100     |
| Egbi 2014         | Nigeria               | community     | C/S        | convenient        | 179   | NR            | general population                     | 45.2            | 46.9       | 0         | urine dipstick test     | CG            | NR                           | NR      | NR     | NR      |
| Ekat 2013         | Congo                 | outpatient    | C/S        | consecutive       | 562   | 74            | HIV naïve                              | 38.8            | 66.1       | 0         | -                       | MDRD          | Jaffe method                 | NR      | NR     | 100     |
| El-Tayeb 2010     | Egypt                 | community     | C/S        | convenient        | 1260  | 100           | general population                     | 20.2            | 32.3       | 78.3      | urine dipstick test     | -             | -                            | 3.3     | NR     | NR      |
| Emem 2008         | Nigeria               | outpatient    | C/S        | consecutive       | 400   | NR            | HIV                                    | 34.6            | 47.5       | NR        | urine dipstick test     | CG            | NR                           | NR      | NR     | 100     |
| Ene-Iordache 2016 | Nigeria               | KDDC database | C/S        | consecutive       | 1912  | NR            | general population                     | 44.4            | 63.4       | NR        | spot urine ACR          | CKD-EPI       | NR                           | NR      | NR     | NR      |
| Ene-Iordache 2016 | Egypt                 | KDDC database | C/S        | consecutive       | 412   | NR            | high risk pop (at risk of or with CKD, | 39.1            | 43.7       | NR        | spot urine ACR          | CKD-EPI       | NR                           | NR      | NR     | NR      |

|                 |              |            |        |                    |      |      |                                |      |      |      |                     |                     |              |      |      |     |
|-----------------|--------------|------------|--------|--------------------|------|------|--------------------------------|------|------|------|---------------------|---------------------|--------------|------|------|-----|
|                 |              |            |        |                    |      |      | HTN, DM, CVD)                  |      |      |      |                     |                     |              |      |      |     |
| Ephraim 2015    | Ghana        | outpatient | C/S    | consecutive        | 208  | 87   | Hypertensive, diabetics        | 60   | 71   | 0    | spot urine ACR      | CKD-EPI             | Jaffe method | 42.3 | 68.8 | NR  |
| Fana 2011       | Zimbabwe     | outpatient | C/S    | consecutive        | 159  | NR   | HIV naïve                      | 18+  | NR   | 0    | urine dipstick test | CG                  | NR           | NR   | NR   | 100 |
| Feteh 2016      | Cameroon     | outpatient | C/S    | consecutive        | 584  | 92   | Diabetics                      | 56.5 | 46.9 | 0    | urine dipstick test | MDRD                | Jaffe method | 62.2 | 100  | NR  |
| Fiseha 2014     | Ethiopia     | outpatient | C/S    | random             | 214  | NR   | Diabetics                      | 45   | 42.5 | NR   | -                   | CG, MDRD            | Jaffe method | 52.8 | 100  | NR  |
| Glaser 2013     | Malawi       | outpatient | C/S    | consecutive        | 363  | 100  | HIV positive, healthy controls | 31   | 48   | NR   | -                   | Cystatin C equation | NR           | NR   | NR   | 100 |
| Janmohamed 2013 | Tanzania     | outpatient | C/S    | consecutive        | 369  | 100  | Diabetics                      | 54   | 53.4 | NR   | urine dipstick test | CG                  | Jaffe method | 57.5 | 100  | NR  |
| Jaao 2011       | 7 countries  | outpatient | C/S    | consecutive        | 2495 | NR   | HIV naïve                      | 30   | 70   | NR   | -                   | CG, MDRD            | NR           | NR   | NR   | 100 |
| Kamkuemah 2015  | South Africa | outpatient | C/S    | consecutive        | 1092 | 100  | HIV naïve                      | 34   | 62   | 0    | -                   | CG                  | NR           | NR   | NR   | 100 |
| Kaze 2013       | Cameroon     | outpatient | C/S    | consecutive        | 104  | NR   | HIV naïve                      | 35   | 68   | 0    | urine dipstick test | MDRD                | Jaffe method | NR   | NR   | 100 |
| Kaze 2015       | Cameroon     | community  | C/S    | multistage cluster | 500  | 100  | general population             | 45.3 | 46.6 | 0    | urine dipstick test | CKD-EPI, CG, MDRD   | Jaffe method | 38.6 | 2.8  | NR  |
| Kaze 2015       | Cameroon     | community  | C/S    | multistage cluster | 439  | 97.5 | general population             | 47   | 57.9 | 72.9 | spot urine ACR      | CKD-EPI, CG, MDRD   | Jaffe method | 25.5 | 9.8  | NR  |
| Kaze 2016       | Cameroon     | outpatient | C/S    | convenient         | 336  | 100  | hypertensive                   | 60.9 | 63.4 | 0    | urine dipstick test | CKD-EPI, CG, MDRD   | Jaffe method | 100  | 18.5 | 3.6 |
| Keegan 2011     | Ghana        | outpatient | C/S    | consecutive        | 192  | NR   | HIV                            | NR   | NR   | NR   | urine dipstick test | CG                  | NR           | NR   | NR   | 100 |
| Longo 2012      | DR Congo     | outpatient | C/S    | consecutive        | 300  | NR   | HIV                            | 43   | 77   | 0    | urine dipstick test | CG, MDRD            | NR           | NR   | NR   | 100 |
| Lucas 2010      | Uganda       | community  | C/S    | random             | 1806 | 97   | HIV positive, healthy controls | 28   | 61.3 | NR   | -                   | MDRD                | Jaffe method | NR   | NR   | NR  |
| Lunyer 2016     | Uganda       | community  | C/S    | convenient         | 141  | NR   | general population             | 18+  | 57   | 0    | urine dipstick test | -                   | -            | 38   | NR   | NR  |
| Mafundikwa 2007 | Zimbabwe     | outpatient | C/S    | consecutive        | 75   | NR   | Diabetics                      | 18+  | NR   | 0    | urine dipstick test | -                   | -            | NR   | 100  | NR  |
| Makusidi 2013   | Nigeria      | community  | C/S    | random             | 535  | 100  | general population             | 37   | 37.9 | 0    | urine dipstick test | -                   | -            | 30.2 | NR   | NR  |
| Masimango 2014  | DR Congo     | outpatient | C/S    | consecutive        | 235  | NR   | HIV                            | 40   | 73.2 | 100  | urine dipstick test | -                   | -            | 30.6 | 20.4 | 100 |
| Matsha 2013     | South Africa | community  | C/S    | random             | 1202 | 96   | general population             | 52.9 | 75.3 | 0    | -                   | CKD-EPI, CG, MDRD   | Jaffe method | NR   | 26.4 | NR  |
| Msango 2011     | Tanzania     | outpatient | C/S    | consecutive        | 355  | 85   | HIV naïve                      | 36.1 | 65   | 0    | urine dipstick test | CG, MDRD            | NR           | NR   | NR   | 100 |
| Mulenga 2008    | Zambia       | outpatient | cohort | consecutive        | 2524 | 71   | HIV naïve                      | 33.7 | 60.5 | 0    | -                   | CG                  | NR           | NR   | NR   | 100 |

|                  |              |            |     |                    |      |      |                                          |       |      |      |                      |                   |                  |      |      |      |
|------------------|--------------|------------|-----|--------------------|------|------|------------------------------------------|-------|------|------|----------------------|-------------------|------------------|------|------|------|
| Nelissen 2014    | Nigeria      | community  | C/S | random             | 1310 | NR   | Hypertensive, healthy controls           | 18+   | 64.8 | 100  | -                    | MDRD              | NR               | 100  | 6.8  | NR   |
| Ngassa 2015      | South Africa | outpatient | C/S | consecutive        | 721  | NR   | Diabetics                                | 57.2  | 62.9 | 0    | -                    | MDRD              | NR               | 79.2 | 100  | NR   |
| Obirikorang 2014 | Ghana        | outpatient | C/S | consecutive        | 163  | NR   | HIV                                      | 39.9  | 77.9 | 0    | -                    | CKD-EPI, MDRD     | NR               | NR   | NR   | 100  |
| Odenigbo 2014    | Nigeria      | community  | C/S | consecutive        | 170  | 77   | general population                       | 68.1  | 32.9 | NR   | -                    | MDRD              | Jaffe method     | NR   | NR   | NR   |
| Odongo 2015      | Uganda       | outpatient | C/S | consecutive        | 361  | 98   | HIV naïve                                | 31.4  | 63.7 | 29.1 | urine dipstick test  | CKD-EPI           | Jaffe method     | 0    | 0    | 100  |
| Okafor 2016      | Nigeria      | outpatient | C/S | consecutive        | 383  | NR   | HIV naïve                                | 35.4  | 58.5 | 0    | spot urine ACR       | MDRD              | NR               | 0    | 0    | 100  |
| Oladapo 2012     | Nigeria      | community  | C/S | consecutive        | 415  | NR   | hypertensive                             | 46.9  | 55.7 | 100  | spot urine ACR       | -                 | -                | 100  | 9.6  | NR   |
| Olanrewaju 2010  | Nigeria      | outpatient | C/S | consecutive        | 138  | NR   | hypertensive                             | 43.2  | 45   | 0    | urine dipstick test  | -                 | -                | 100  | NR   | NR   |
| Onodugo 2013     | Nigeria      | outpatient | C/S | consecutive        | 300  | NR   | HIV naïve                                | 18+   | 65.3 | 0    | -                    | CG                | Jaffe method     | 0    | 0    | 100  |
| Osafo 2011       | Ghana        | outpatient | C/S | consecutive        | 712  | NR   | hypertensive                             | 59    | 78.7 | 0    | spot urine ACR       | MDRD              | Jaffe method     | 100  | 14.7 | NR   |
| Peck 2016        | Tanzania     | community  | C/S | multistage random  | 1043 | 72   | general population                       | 35.5  | 54.3 | NR   | -                    | CKD-EPI, MDRD     | Jaffe method     | 17.3 | 0.9  | 8.4  |
| Peck 2014        | Tanzania     | outpatient | C/S | consecutive        | 454  | 94   | HIV positive, healthy controls           | 38    | 61.4 | 0    | urine dipstick test  | CKD-EPI           | Jaffe method     | 16.3 | 0    | 67   |
| Peer 2008        | South Africa | outpatient | C/S | consecutive        | 403  | NR   | hypertensive                             | 52    | 55   | 0    | spot urine ACR       | CG                | NR               | 100  | 12   | NR   |
| Prujm 2008       | Seychelles   | community  | C/S | random             | 1218 | 80.2 | general population                       | 25-64 | 54.1 | NR   | spot urine ACR       | MDRD              | Jaffe method     | 23.7 | 36.1 | NR   |
| Rasmussen 2016   | Zambia       | outpatient | C/S | consecutive        | 160  | NR   | hypertensive                             | 60.6  | 68.8 | 100  | spot urine ACR       | -                 | -                | 100  | 42.5 | NR   |
| Salako 2007      | Nigeria      | outpatient | C/S | consecutive        | 54   | NR   | hypertensive                             | 59.1  | 46.3 | 0    | urine dipstick test  | CG                | enzymatic method | 100  | 1.9  | NR   |
| Sarfo 2013       | Ghana        | outpatient | C/S | consecutive        | 3137 | 78   | HIV naïve                                | 38    | 67   | 0    | -                    | CKD-EPI, CG, MDRD | NR               | NR   | NR   | 100  |
| Seck 2013        | Senegal      | community  | C/S | random             | 402  | 53.2 | general population                       | 46.2  | 33.8 | 0    | spot urine ACR       | MDRD              | NR               | 24.1 | 9.7  | NR   |
| Seck 2014        | Senegal      | community  | C/S | multistage cluster | 1036 | 99   | general population                       | 48    | 60   | 47   | 24-h proteinuria     | MDRD              | Jaffe method     | 39.1 | 12.7 | NR   |
| Stanifer 2015    | Tanzania     | community  | C/S | multistage cluster | 481  | 80   | general population                       | 45    | 74.4 | 23   | urine dipstick test  | MDRD              | Jaffe method     | 28   | 12.7 | NR   |
| Struik 2011      | Malawi       | outpatient | C/S | consecutive        | 509  | 95   | HIV naïve                                | 34.3  | 66.5 | 0    | -                    | CG                | NR               | NR   | NR   | 100  |
| Sumaili 2009     | DR Congo     | community  | C/S | multistage cluster | 500  | 99   | general population                       | 38.6  | 59   | 0    | urine dipstick test  | CG, MDRD          | Jaffe method     | 27.6 | 11.7 | NR   |
| Sumaili 2009     | DR Congo     | outpatient | C/S | convenient         | 527  | 95   | at risk population (HTN/DM/O besity/HIV) | 53.9  | NR   | 0    | dipstick (24HUP>300) | MDRD              | Jaffe Method     | 58.2 | 54.5 | 43.4 |

|                       |              |            |     |                           |      |      |                                |       |      |      |                     |                   |              |      |      |     |
|-----------------------|--------------|------------|-----|---------------------------|------|------|--------------------------------|-------|------|------|---------------------|-------------------|--------------|------|------|-----|
| Wensink 2015          | South Africa | outpatient | C/S | random                    | 903  |      | HIV                            | 40    | 69   | 100  | -                   | CKD-EPI, MDRD     | NR           | 23   | 4    | 100 |
| Wools-Kaloustian 2007 | Kenya        | outpatient | C/S | consecutive               | 389  | NR   | HIV naïve                      | 35    | 67.9 | NR   | urine dipstick test | CG, MDRD          | NR           | NR   | NR   | 100 |
| Wyatt 2011            | Rwanda       | outpatient | C/S | consecutive               | 865  | NR   | HIV positive, healthy controls | 43    | 100  | NR   | urine dipstick test | CKD-EPI, CG, MDRD | Jaffe method | 8.3  | 0.5  | 100 |
| Wachukwu 2015         | Nigeria      | community  | C/S | consecutive               | 259  | NR   | general population             | 28.3  | 47.9 | 0    | urine dipstick test | CG                | NR           | 20.8 | 4.3  | NR  |
| Oluyombo 2013         | Nigeria      | community  | C/S | random multistage         | 454  | NR   | general population             | 45.8  | 56.6 | NR   | urine dipstick test | MDRD              | NR           | 20.4 | 0.6  | NR  |
| Ekat 2012             | Congo        | outpatient | C/S | consecutive               | 562  | NR   | HIV naïve                      | 38.8  | 66.6 | 0    | -                   | MDRD              | NR           | NR   | NR   | 100 |
| Makulo 2010           | DR Congo     | community  | C/S | random                    | 229  | NR   | Diabetics, healthy controls    | 55.8  | 66.8 | 100  | -                   | MDRD              | NR           | NR   | 100  | NR  |
| Ayodele 2007          | Nigeria      | outpatient | C/S | consecutive               | 147  | NR   | hypertensive                   | 55.8  | 55.8 | 0    | urine dipstick test | CG, MDRD          | NR           | 100  | NR   | NR  |
| Machingura 2016       | Zimbabwe     | outpatient | C/S | consecutive               | 344  | 98.9 | Diabetics                      | 57.6  | 72.7 | 0    | spot urine ACR      | CKD-EPI           | Jaffe method | NR   | 100  | NR  |
| Akpan 2016            | Nigeria      | community  | C/S | consecutive               | 502  | NR   | general population             | 38.5  | 70.6 | 0    | urine dipstick test | MDRD              | Jaffe method | 30.2 | 5.8  | NR  |
| Divala 2016           | Malawi       | outpatient | C/S | consecutive               | 948  | NR   | HIV positive                   | 43    | 71.7 | 49.6 | urine dipstick test | -                 | -            | 23.7 | 4.1  | 100 |
| Glaser 2016           | Malawi       | outpatient | C/S | consecutive               | 363  | 96   | HIV positive, healthy controls | 33.9  | 49   | 0    | spot urine ACR      | Cystatin C        | Jaffe method | 7.8  | NR   | 100 |
| Laurence 2016         | South Africa | community  | C/S | random                    | 454  | NR   | general population             | 46.3  | 70.7 | 0    | spot urine ACR      | MDRD              | NR           | 36.6 | 3.3  | NR  |
| Satman 2016           | South Africa | outpatient | RCT | random                    | 244  | NR   | Diabetics                      | NR    | NR   | NR   | spot urine ACR      | MDRD              | Jaffe method | NR   | 100  | NR  |
| Mekuria 2016          | Ethiopia     | outpatient | C/S | consecutive               | 446  | NR   | HIV naïve                      | 38.3  | 63   | 20.4 | NA                  | CG                | Jaffe method | 26.3 | 17.5 | 100 |
| Okafor 2016           | Nigeria      | community  | C/S | consecutive               | 99   | 95.2 | general population             | 50.7  | 73.6 | 100  | urine dipstick test | CG                | Jaffe method | 17.2 | 8.1  | NR  |
| Stanifer 2016         | Tanzania     | community  | C/S | stratified random cluster | 45   | 79.4 | Diabetics                      | 45    | 66.7 | 23   | urine dipstick test | MDRD              | Jaffe method | 53.4 | 100  | NR  |
| Fouad 2016            | Egypt        | community  | C/S | consecutive               | 3000 | NR   | general population             | 22.8  | 54   | 0    | spot urine ACR      | CG                | NR           | NR   | NR   | NR  |
| Ogola 2016            | Kenya        | outpatient | C/S | consecutive               | 385  | NR   | Diabetics                      | 63.3  | 65.5 | 100  | urine dipstick test | NR                | NR           | 100  | NR   | NR  |
| Owiredu 2013          | Ghana        | outpatient | C/S | consecutive               | 276  | NR   | HIV naïve                      | 33.42 | 70   | 0    | NA                  | CKD-EPI, CG, MDRD | Jaffe method | NR   | NR   | 100 |
| Beheiry 2015          | Sudan        | Outpatient | C/S | random                    | 81   | NR   | hypertensive                   | NR    | NR   | NR   | 24-h proteinuria    | NA                | -            | NR   | NR   | NR  |
| Bolarinwa 2012        | Nigeria      | Outpatient | C/S | consecutive               | 72   | NR   | Sickle cell patients           | 24.3  | 72.2 | 0    | spot urine ACR      | CG                | NR           | NR   | NR   | NR  |

|                |                  |            |     |                |      |      |                      |      |      |      |                     |                   |              |      |     |     |
|----------------|------------------|------------|-----|----------------|------|------|----------------------|------|------|------|---------------------|-------------------|--------------|------|-----|-----|
| Abdu 2011      | Nigeria          | outpatient | C/S | consecutive    | 200  | NR   | Sickle cell patients | NR   | 50   | 0    | urine dipstick test | -                 | -            | NR   | NR  | NR  |
| Cohen 2010     | Malawi           | outpatient | C/S | consecutive    | 522  | 85   | Diabetics            | 53.2 | NR   | 0    | urine dipstick test | -                 | -            | NR   | 100 | NR  |
| Ebong 2007     | Cameroon         | community  | C/S | consecutive    | 482  | NR   | general population   | NR   | 57.5 | 100  | urine dipstick test | -                 | -            | NR   | NR  | NR  |
| Mpondo 2014    | Tanzania         | outpatient | C/S | consecutive    | 171  | 71.8 | HIV naïve            | 38   | 70   | 0    | urine dipstick test | CG, MDRD          | Jaffe method | NR   | NR  | NR  |
| Sumaili 2008   | DR Congo         | community  | C/S | consecutive    | 3018 | NR   | general population   | NR   | NR   | 0    | urine dipstick test | -                 | -            | NR   | NR  | NR  |
| Stohr 2008     | Zimbabwe, Uganda | outpatient | RCT | random         | 3316 | 100  | HIV naïve            | NR   | 65   | 0    | -                   | CG, MDRD          | Jaffe method | NR   | NR  | 100 |
| Addo 2009      | Ghana            | community  | C/S | consecutive    | 219  | 71.3 | hypertensive         | 50.4 | 36   | 0    | -                   | MDRD              | Jaffe method | NR   | NR  | NR  |
| Eastwood 2010  | Ghana            | community  | C/S | cluster random | 944  | 93.7 | general population   | 54.7 | 62.4 | 100  | -                   | CKD-EPI, CG, MDRD | Jaffe method | NR   | NR  | NR  |
| Abu-Aisha 2009 | Sudan            | community  | C/S | random         | 273  | 62.6 | general population   | 34.3 | 50.9 | 0    | urine dipstick test | CG, MDRD          | NR           | NR   | NR  | NR  |
| Fatiu 2011     | Nigeria          | community  | C/S | consecutive    | 286  | NR   | general population   | 49.5 | 90.2 | 100  | urine dipstick test | -                 | -            | 37.7 | NR  | NR  |
| Ulasi 2013     | Nigeria          | community  | C/S | random         | 1941 | 89   | general population   | 43.7 | 63.4 | 31.5 | urine dipstick test | CKD-EPI           | Jaffe method | 26.1 | 5.9 | NR  |

**Table S3: Summary statistics for prevalence of CKD stages 1-5 in general populations**

| Group                         | Subgroup           | N studies | Size  | Prevalence (95% CI) | H (95% CI)     | I <sup>2</sup> (95% CI) | p-heterogeneity | p-diff sub-groups | p-Egger test |
|-------------------------------|--------------------|-----------|-------|---------------------|----------------|-------------------------|-----------------|-------------------|--------------|
| Overall                       | -                  | 22        | 23825 | 15.8 (12.1-19.9)    | 7.5 (6.8-8.2)  | 98.2 (98.0-99.0)        | <0.001          | <0.001            | 0.265        |
| Equation                      | MDRD               | 14        | 16059 | 13.7 (10.2-17.6)    | 5.3 (4.6-6.2)  | 96.5 (95.0-97.0)        | <0.001          | -                 | 0.029        |
|                               | Cockcroft-Gault    | 8         | 5316  | 21.3 (9.9-35.5)     | 10.1(8.9-11.5) | 99.0 (98.9-99.1)        | <0.001          | -                 | 0.004        |
|                               | CKD-EPI            | 5         | 4854  | 19.5 (13.8-25.9)    | 4.9 (3.8-6.5)  | 95.9 (93.0-98.0)        | <0.001          | -                 | 0.789        |
|                               | Cystatin C         | 1         | 247   | 8.5 (5.3-12.7)      | -              | -                       | -               | -                 | -            |
| Region                        | Overall            | 22        | 23825 | 15.8 (12.1-19.9)    | 7.5 (6.8-8.2)  | 98.2 (98.0-99.0)        | <0.001          | <0.001            | 0.265        |
|                               | Central            | 3         | 1439  | 16.0 (7.3-27.2)     | 5.3 (3.7-7.7)  | 96.4 (93.0-98.0)        | <0.001          | -                 | 0.035        |
|                               | Eastern            | 3         | 881   | 14.4 (7.2-23.4)     | 3.3 (2.0-5.3)  | 90.7 (76.0-96.0)        | <0.001          | -                 | 0.706        |
|                               | Northern           | 3         | 13797 | 6.1 (3.6-9.3)       | 5.1 (3.5-7.5)  | 96.2 (92.0-98.0)        | <0.001          | -                 | 0.409        |
|                               | Southern           | 1         | 454   | 10.4 (7.7-13.5)     | -              | -                       | -               | -                 | -            |
|                               | Western            | 12        | 7254  | 19.8 (14.1-26.1)    | 6.1 (5.2-7.1)  | 97.3 (96.0-98.0)        | <0.001          | -                 | 0.130        |
| North vs Sub-Saharan          |                    | 22        | 23825 | 15.8 (12.1-19.9)    | 7.5 (6.8-8.2)  | 98.2 (98.0-99.0)        | <0.001          | <0.001            | 0.265        |
|                               | Sub-Saharan Africa | 19        | 10028 | 17.7 (13.7-22.1)    | 5.4 (4.7-6.1)  | 96.5 (96.0-97.0)        | <0.001          | -                 | 0.124        |
|                               | North Africa       | 3         | 13797 | 6.1 (3.6-9.3)       | 5.1 (3.5-7.5)  | 96.2 (92.0-98.0)        | <0.001          | -                 | 0.409        |
| Publication year, median 2013 | Overall            | 22        | 23825 | 15.8 (12.1-19.9)    | 7.5 (6.8-8.2)  | 98.2 (98.0-99.0)        | <0.001          | 0.332             | 0.265        |
|                               | Above median       | 15        | 19770 | 14.5 (10.3-19.3)    | 7.6 (6.8-8.5)  | 98.3 (98.0-99.0)        | <0.001          | -                 | 0.826        |
|                               | Below median       | 7         | 4055  | 18.6 (12.2-26.0)    | 5.4 (4.3-6.7)  | 96.5 (95.0-98.0)        | <0.001          | -                 | 0.589        |
| Study size (median, 446.5)    | Overall            | 22        | 23825 | 15.8 (12.1-19.9)    | 7.5 (6.8-8.2)  | 98.2 (98.0-99.0)        | <0.001          | 0.08              | 0.265        |
|                               | Above median       | 11        | 21213 | 12.3 (8.5-16.6)     | 8.2 (7.2-9.3)  | 98.5 (98.0-99.0)        | <0.001          | -                 | 0.570        |
|                               | Below median       | 11        | 2612  | 20.0 (12.6-28.6)    | 5.2 (4.3-6.1)  | 96.2 (95.0-97.0)        | <0.001          | -                 | 0.035        |
| Age (median, 45 years)        | Overall            | 22        | 23825 | 15.8 (12.1-19.9)    | 7.5 (6.8-8.2)  | 98.2 (98.0-99.0)        | <0.001          | 0.814             | 0.265        |
|                               | Above median       | 12        | 15318 | 15.3 (11.0-20.1)    | 5.9 (5.0-6.8)  | 97.1 (96.0-98.0)        | <0.001          | -                 | 0.062        |

|  |              |    |      |                 |                |      |        |   |       |
|--|--------------|----|------|-----------------|----------------|------|--------|---|-------|
|  | Below median | 10 | 8507 | 16.3 (9.4-24.8) | 9.0 (7.9-10.2) | 98.8 | <0.001 | - | 0.004 |
|--|--------------|----|------|-----------------|----------------|------|--------|---|-------|

**Table S4: Summary statistics for prevalence of CKD stages 3-5 in general populations**

| Group                         | Subgroup           | N studies | Size  | Prevalence (95% CI) | H (95% CI)    | I <sup>2</sup> (95% CI) | p-heterogeneity | p-diff sub-groups | p-Egger test |
|-------------------------------|--------------------|-----------|-------|---------------------|---------------|-------------------------|-----------------|-------------------|--------------|
| Overall                       | -                  | 27        | 25929 | 4.6 (3.3- 6.1)      | 4.8 (4.3-5.3) | 95.6 (94.0-96.0)        | <0.001          | <0.001            | 0.045        |
| Equation                      | MDRD               | 21        | 22969 | 4.5 (3.0- 6.3)      | 5.1 (4.5-5.8) | 96.2 (95.0-97.0)        | <0.001          | -                 | 0.092        |
|                               | Cockcroft-Gault    | 11        | 4927  | 11.8 (7.3-17.1)     | 5.2 (4.4-6.2) | 96.4 (95.0-97.0)        | <0.001          | -                 | 0.030        |
|                               | CKD-EPI            | 7         | 6184  | 5.1 (3.1-7.6)       | 3.8 (2.9-5.0) | 93.2 (88.0-96.0)        | <0.001          | -                 | 0.110        |
|                               | Cystatin C         | 1         | 247   | 2.4 (0.9-5.2)       | -             | -                       | -               | -                 | -            |
| Region                        | Overall            | 27        | 25929 | 4.6 (3.3- 6.1)      | 4.8 (4.3-5.3) | 95.6 (94.0-96.0)        | <0.001          | <0.001            | 0.045        |
|                               | Central            | 4         | 1587  | 6.8 (4.0-10.2)      | 2.4 (1.5-3.9) | 82.8 (56.0-93.0)        | 0.001           | -                 | 0.349        |
|                               | Eastern            | 7         | 3517  | 2.5 (0.6-5.5)       | 4.1 (3.2-5.3) | 94.1 (90.0-96)          | <0.001          | -                 | 0.944        |
|                               | Northern           | 2         | 10797 | 2.6 (2.3-2.9)       | 7.1 (5.2-9.7) | 99.0 (96.0-99.1)        | <0.001          | -                 | -            |
|                               | Southern           | 2         | 2391  | 7.2 (6.1- 8.2)      | 7.1 (5.2-9.7) | 99.0 (96.0-99.1)        | <0.001          | -                 | -            |
|                               | Western            | 12        | 7637  | 5.3 (2.7-8.7)       | 5.4 (4.6-6.3) | 96.6 (95.0-98.0)        | <0.001          | -                 | 0.906        |
| North vs Sub-Saharan          | -                  | 27        | 25929 | 4.6 (3.3- 6.1)      | 4.8 (4.3-5.3) | 95.6 (94.0-96.0)        | <0.001          | 0.004             | 0.045        |
|                               | Sub-Saharan Africa | 25        | 15132 | 4.8 (3.2-6.6)       | 4.6 (4.1-5.2) | 95.3 (94.0-96.0)        | <0.001          | -                 | 0.446        |
|                               | North Africa       | 2         | 10797 | 2.6 (2.3-2.9)       | 7.1 (5.2-9.7) | 99.0 (96.0-99.1)        | <0.001          | -                 | -            |
| Publication year, median 2013 | Overall            | 27        | 25929 | 4.6 (3.3- 6.1)      | 4.8 (4.3-5.3) | 95.6 (94.0-96.0)        | <0.001          | 0.015             | 0.045        |
|                               | At or above median | 19        | 21710 | 5.7 (4.0-7.8)       | 5.1 (4.5-5.8) | 96.1 (95.0-97.0)        | <0.001          | -                 | 0.006        |
|                               | Below median       | 8         | 4219  | 2.4 (0.9-4.4)       | 3.6 (2.8-4.6) | 92.1 (87.0-95.0)        | <0.001          | -                 | 0.379        |
| Study size (median, 402)      | Overall            | 27        | 25929 | 4.6 (3.3- 6.1)      | 4.8 (4.3-5.3) | 95.6 (94.0-96.0)        | <0.001          | 0.555             | 0.045        |
|                               | Above median       | 14        | 23524 | 4.2 (2.9-5.7)       | 4.9 (4.2-5.7) | 95.8 (94.0-97.0)        | <0.001          | -                 | 0.043        |
|                               | Below median       | 13        | 2405  | 5.3 (1.7-10.7)      | 4.8 (4.1-5.7) | 95.7 (94.0-97.0)        | <0.001          | -                 | 0.003        |

|                          |              |    |       |                |               |                  |        |       |       |
|--------------------------|--------------|----|-------|----------------|---------------|------------------|--------|-------|-------|
| Age (median, 43.7 years) | Overall      | 27 | 25929 | 4.6 (3.3- 6.1) | 4.8 (4.3-5.3) | 95.6 (94.0-96.0) | <0.001 | 0.013 | 0.045 |
|                          | Above median | 15 | 19177 | 6.4 (4.2-8.9)  | 5.6 (4.9-6.4) | 96.8 (96.0-98.0) | <0.001 | -     | 0.113 |
|                          | Below median | 12 | 6752  | 2.7 (1.3-4.6)  | 3.7 (3.1-4.6) | 92.8 (89.0-95.0) | <0.001 | -     | 0.256 |

**Table S5: Summary statistics for prevalence of CKD stages 1-5 in high-risk populations**

| Group                         | Subgroup           | N studies | Size | Prevalence (95% CI) | H (95% CI)       | I <sup>2</sup> (95% CI) | p-heterogeneity | p-diff sub-groups | p-Egger test |
|-------------------------------|--------------------|-----------|------|---------------------|------------------|-------------------------|-----------------|-------------------|--------------|
| Overall                       | Overall            | 21        | 5056 | 32.3 (23.4-41.8)    | 7.0 (6.3-7.7)    | 98.0 (97.9-98.1)        | <0.001          | -                 | 0.005        |
| Pathology                     | Overall            | 21        | 5056 | 32.3 (23.4-41.8)    | 7.0 (6.3-7.7)    | 98.0 (97.9-98.1)        | <0.001          | <0.001            | 0.005        |
|                               | HIV                | 10        | 2007 | 27.3 (17.0-38.9)    | 5.5 (4.6-6.6)    | 96.7 (95.0-98.0)        | <0.001          | -                 | 0.003        |
|                               | HTN                | 6         | 2199 | 35.6 (27.9-43.7)    | 3.7 (2.8-5.0)    | 92.8 (87.0-96.0)        | <0.001          | -                 | 0.331        |
|                               | DM                 | 4         | 778  | 32.6 (0.3-82.3)     | 13.9 (11.8-16.3) | 99.5 (99.0-100)         | <0.001          | -                 | 0.282        |
|                               | Sickle cell        | 1         | 72   | 69.4 (57.5-79.8)    | -                | -                       | -               | -                 | -            |
| Equation                      | MDRD               | 11        | 3262 | 27.7 (17.1-39.7)    | 7.2 (6.3-8.3)    | 98.1 (97.0-99.0)        | <0.001          | -                 | 0.005        |
|                               | Cockcroft-Gault    | 6         | 1361 | 49.8 (28.8-70.8)    | 7.9 (6.6-9.5)    | 98.4 (98.0-99.0)        | <0.001          | -                 | 0.039        |
|                               | CKD-EPI            | 6         | 1234 | 34.7 (26.8-43.1)    | 2.9 (2.1-4.1)    | 88.0 (76.0-94.0)        | <0.001          | -                 | 0.901        |
|                               | Cystatin C         | 1         | 116  | 22.4 (15.2-31.1)    | -                | -                       | -               | -                 | -            |
| Region                        | Overall            | 21        | 5056 | 32.3 (23.4-41.8)    | 7.0 (6.3-7.7)    | 98.0 (97.9-98.1)        | <0.001          | <0.001            | 0.005        |
|                               | Central            | 3         | 967  | 26.5 (7.5-51.6)     | 7.6 (5.7-10.2)   | 98.3 (97.0-99.0)        | <0.001          | -                 | 0.195        |
|                               | Eastern            | 6         | 1076 | 42.8 (21.8-65.3)    | 7.3 (6.0-8.8)    | 98.1 (97.0-99.0)        | <0.001          | -                 | 0.003        |
|                               | Northern           | 1         | 412  | 32.3 (27.8-37.0)    | -                | -                       | -               | -                 | -            |
|                               | Southern           | 2         | 308  | 2.7 (1.1-5.0)       | 9.7 (7.5-12.5)   | 99.5 (98.0-99.9)        | <0.001          | -                 | -            |
|                               | Western            | 9         | 2293 | 36.6 (26.9-46.9)    | 4.8 (4.0-5.9)    | 95.7 (94.0-97.0)        | <0.001          | -                 | 0.559        |
| North vs Sub-Saharan          | Overall            | 21        | 5056 | 32.3 (23.4-41.8)    | 7.0 (6.3-7.7)    | 98.0 (97.9-98.1)        | <0.001          | <0.001            | 0.005        |
|                               | Sub-Saharan Africa | 20        |      | 32.3 (22.8-42.5)    | 7.2 (6.5-7.9)    | 98.1 (98.0-98.4)        | <0.001          | -                 | 0.008        |
|                               | North Africa       | 1         | 412  | 32.3 (27.8-37.0)    | -                | -                       | -               | -                 | -            |
| Publication year, median 2014 | Overall            | 21        | 5056 | 32.3 (23.4-41.8)    | 7.0 (6.3-7.7)    | 98.0 (97.9-98.1)        | <0.001          | 0.233             | 0.005        |
|                               | At or above median | 13        | 2688 | 27.8 (18.4-38.3)    | 5.7 (4.9-6.6)    | 96.9 (96.0-98.0)        | <0.001          | -                 | 0.001        |
|                               | Below median       | 8         | 2368 | 39.9 (23.5-57.6)    | 8.4 (7.3-9.8)    | 98.6 (98.0-99.0)        | <0.001          | -                 | 0.568        |
| Study size (median, 192)      | Overall            | 21        | 5056 | 32.3 (23.4-41.8)    | 7.0 (6.3-7.7)    | 98.0 (97.9-98.1)        | <0.001          | 0.109             | 0.005        |



|                          |                    |    |      |                  |               |                  |        |       |        |
|--------------------------|--------------------|----|------|------------------|---------------|------------------|--------|-------|--------|
|                          | At or above median | 11 | 4022 | 39.3 (26.8-52.4) | 8.5 (7.5-9.6) | 98.6 (98.0-99.0) | <0.001 | -     | 0.012  |
|                          | Below median       | 10 | 1034 | 24.7 (14.0-37.2) | 4.4 (3.6-5.3) | 94.7 (92.0-96.0) | <0.001 | -     | <0.001 |
| Age (median, 40.1 years) | Overall            | 21 | 5056 | 32.3 (23.4-41.8) | 7.0 (6.3-7.7) | 98.0 (97.9-98.1) | <0.001 | 0.466 | 0.005  |
|                          | At or above median | 12 | 3229 | 35.2 (22.6-49.0) | 7.8 (6.9-8.9) | 98.4 (98.0-99.0) | <0.001 | -     | 0.025  |
|                          | Below median       | 9  | 1827 | 28.4 (16.9-41.5) | 5.8 (4.8-6.9) | 97.0 (96.0-98.0) | <0.001 | -     | 0.008  |

**Table S6: Summary statistics for prevalence of CKD stages 3-5 in high-risk populations**

| Group                         | Subgroup           | N studies | Size  | Prevalence (95% CI) | H (95% CI)       | I <sup>2</sup> (95% CI) | p-heterogeneity | p-diff sub-groups | p- Egger test |
|-------------------------------|--------------------|-----------|-------|---------------------|------------------|-------------------------|-----------------|-------------------|---------------|
| Overall                       | Overall            | 50        | 52353 | 13.3 (10.7-16.0)    | 7.8 (7.3-8.2)    | 98.3 (98.0-99.0)        | <0.001          | -                 | 0.019         |
| Pathology                     | Overall            | 50        | 52353 | 13.3 (10.7-16.0)    | 7.8 (7.3-8.2)    | 98.3 (98.0-99.0)        | <0.001          | <0.001            | 0.019         |
|                               | HIV                | 28        | 44239 | 9.1 (6.6-11.9)      | 7.9 (7.3-8.6)    | 98.4 (98.0-99.0)        | <0.001          | -                 | 0.018         |
|                               | HTN                | 11        | 2971  | 17.9 (10.9-26.1)    | 5.3 (4.5-6.3)    | 96.5 (95.0-97.0)        | <0.001          | -                 | 0.060         |
|                               | DM                 | 10        | 5071  | 22.0 (16.1-28.6)    | 4.9 (4.1-5.9)    | 95.8 (94.0-97.0)        | <0.001          | -                 | 0.004         |
|                               | Sickle cell        | 1         | 72    | 19.4 (11.1-30.5)    | -                | -                       | -               | -                 | -             |
| Equation                      | MDRD               | 31        | 21642 | 10.6 (7.6-13.9)     | 7.3 (6.8-8.0)    | 98.1 (98.0-98.3)        | <0.001          | -                 | <0.001        |
|                               | Cockcroft-Gault    | 22        | 40610 | 16.2 (11.2-21.9)    | 11.7 (10.9-12.5) | 99.3 (99.0-99.4)        | <0.001          | -                 | 0.114         |
|                               | CKD-EPI            | 11        | 6295  | 11.6 (6.2-18.3)     | 6.6 (5.7-7.7)    | 97.7 (97.0-98.0)        | <0.001          | -                 | 0.203         |
|                               | Cystatin C         | 1         | 116   | 4.3 (1.4-9.8)       | -                | -                       | -               | -                 | -             |
| Region                        | Overall            | 50        | 52353 | 13.3 (10.7-16.0)    | 7.8 (7.3-8.2)    | 98.3 (98.0-99.0)        | <0.001          | <0.001            | 0.019         |
|                               | Central            | 7         | 2952  | 15.4 (8.4-24.0)     | 5.9 (4.8-7.2)    | 97.1 (96.0-98.0)        | <0.001          | -                 | 0.002         |
|                               | Eastern            | 21        | 34951 | 11.5 (8.0-15.6)     | 7.8 (7.1-8.5)    | 98.3 (98.0-99.0)        | <0.001          | -                 | 0.035         |
|                               | Northern           | -         | -     | -                   | -                | -                       | -               | -                 | -             |
|                               | Southern           | 4         | 3119  | 5.5 (0.9-13.6)      | 7.8 (6.2- 10.0)  | 98.4 (97.0-99.0)        | 0.002           | -                 | 0.125         |
|                               | Western            | 17        | 8836  | 18.2 (13.3-23.7)    | 5.7 (5.1-6.5)    | 97.0 (96.0-98.0)        | <0.001          | -                 | 0.835         |
| Publication year, median 2013 | Overall            | 50        | 52353 | 13.3 (10.7-16.0)    | 7.8 (7.3-8.2)    | 98.3 (98.0-99.0)        | <0.001          | 0.324             | 0.019         |
|                               | At or above median | 29        | 14302 | 14.4 (11.0-18.2)    | 5.9 (5.4-6.5)    | 97.2 (97.0-98.0)        | <0.001          | -                 | <0.001        |
|                               | Below median       | 21        | 38051 | 11.7 (8.0-16.0)     | 9.1 (8.4-9.9)    | 98.8 (98.6-99.1)        | <0.001          | -                 | 0.025         |
| Study size (median, 349.5)    | Overall            | 50        | 52353 | 13.3 (10.7-16.0)    | 7.8 (7.3-8.2)    | 98.3 (98.0-99.0)        | <0.001          | 0.330             | 0.019         |
|                               | At or above median | 25        | 47921 | 12.0 (8.9-15.6)     | 9.8 (9.1-10.5)   | 99.0 (98.9-99.1)        | <0.001          | -                 | 0.060         |
|                               | Below median       | 25        | 4432  | 14.7 (10.2-19.9)    | 4.6 (4.0-5.1)    | 95.2 (94.0-96.0)        | <0.001          | -                 | <0.001        |

|                        |                    |    |       |                  |               |                  |        |       |        |
|------------------------|--------------------|----|-------|------------------|---------------|------------------|--------|-------|--------|
| Age (median, 40 years) | Overall            | 50 | 52353 | 13.3 (10.7-16.0) | 7.8 (7.3-8.2) | 98.3 (98.0-99.0) | <0.001 | 0.019 | 0.019  |
|                        | At or above median | 24 | 9535  | 17.2 (12.5-22.5) | 6.3 (5.7-7.0) | 97.5 (97.0-98.0) | <0.001 | -     | <0.001 |
|                        | Below median       | 22 | 38861 | 10.3 (7.3-13.7)  | 8.0 (7.3-8.7) | 98.4 (98.0-99.0) | <0.001 | -     | 0.056  |

**Item 4: Item 4: Supplementary figures**

**A: MDRD equation**

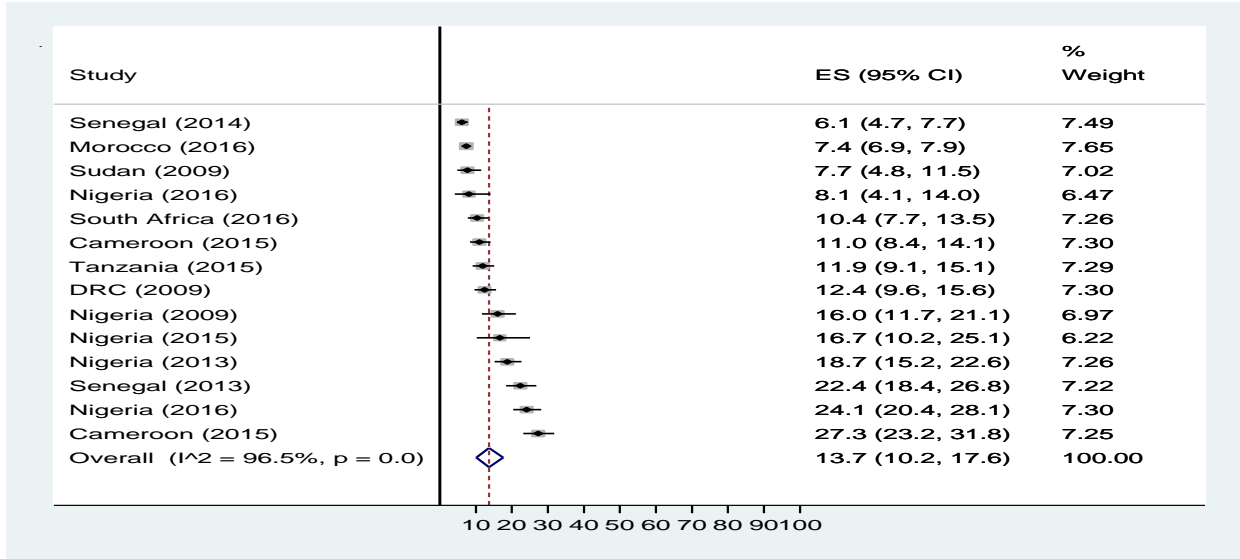

**B: Cockcroft-Gault formula**

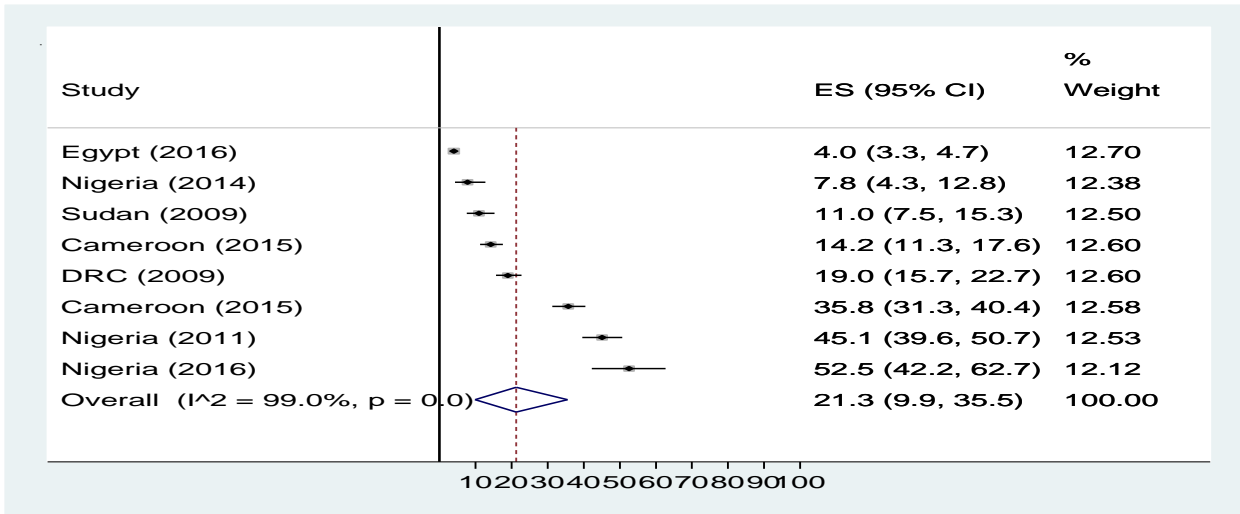

### C: CKD-EPI formula

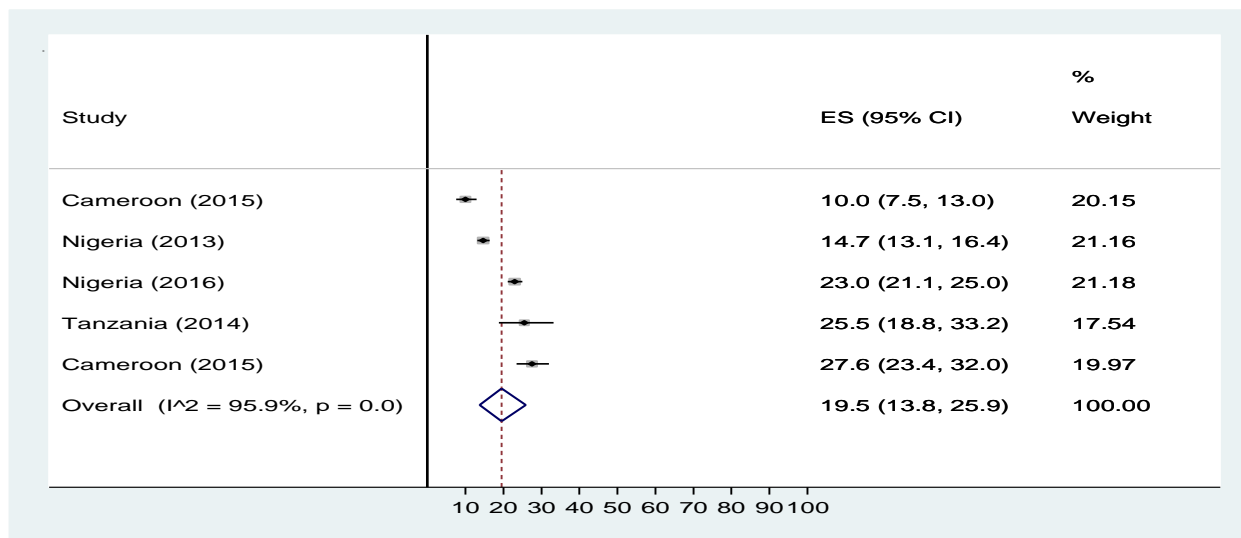

**Figure S1: Prevalence of CKD in the general population of Africa according to eGFR equation.** Figure panels are for the prevalence of CKD according to the MDRD equation (panel A), according to the Cockcroft-Gault formula (panel B), and according to the CKD-EPI equation (panel C). For each panel, the black boxes represent the effect estimates (prevalence) and the horizontal bars about are for the 95% confidence intervals (CIs). The diamond is for the pooled effect estimate and 95% CI and the dotted vertical line centered on the diamond has been added to assist visual interpretation.

### A: MDRD equation

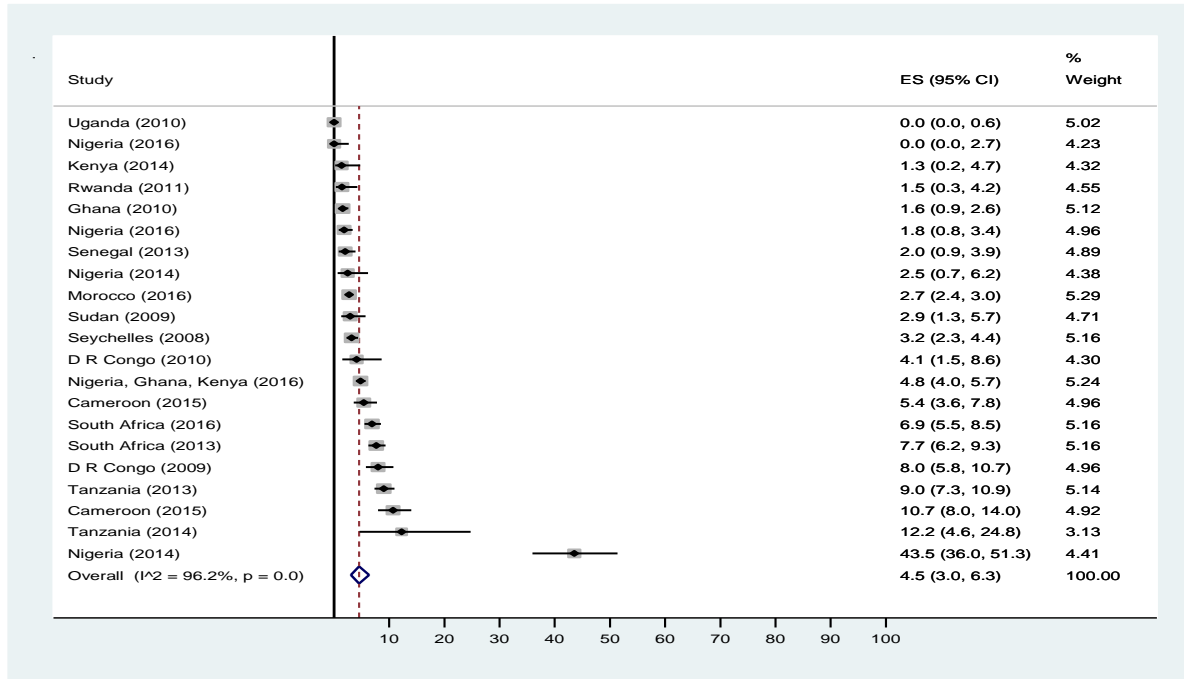

### B: Cockcroft-Gault formula

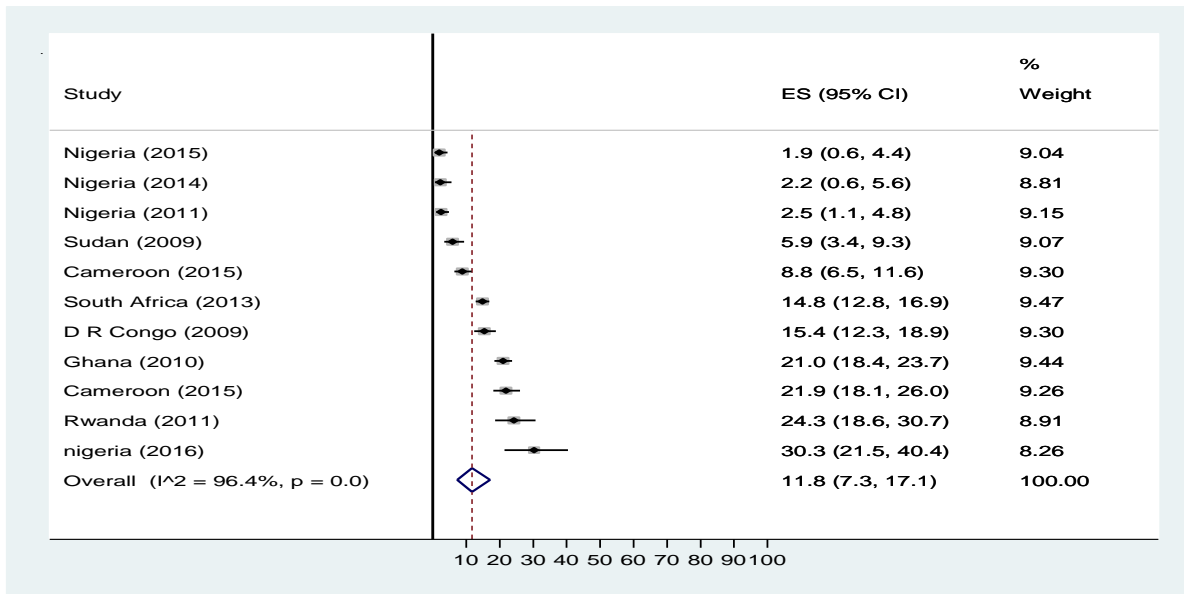

### C: CKD-EPI equation

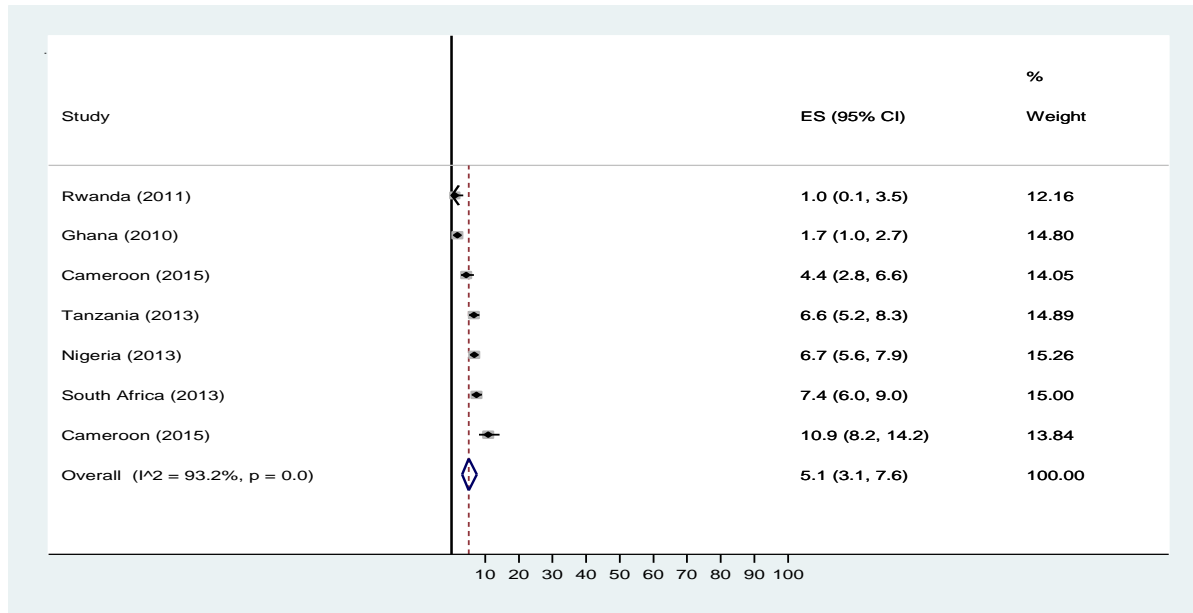

**Figure S2: Prevalence of CKD stages 3 to 5 in the general population of Africa according to eGFR equation.** Figure panels are for the prevalence of CKD stages 3-5 according to the MDRD equation (panel A), according to the Cockcroft-Gault formula (panel B), and according to the CKD-EPI equation (panel C). For each panel, the black boxes represent the effect estimates (prevalence) and the horizontal bars about are for the 95% confidence intervals (CIs). The diamond is for the pooled effect estimate and 95% CI and the dotted vertical line centered on the diamond has been added to assist visual interpretation.

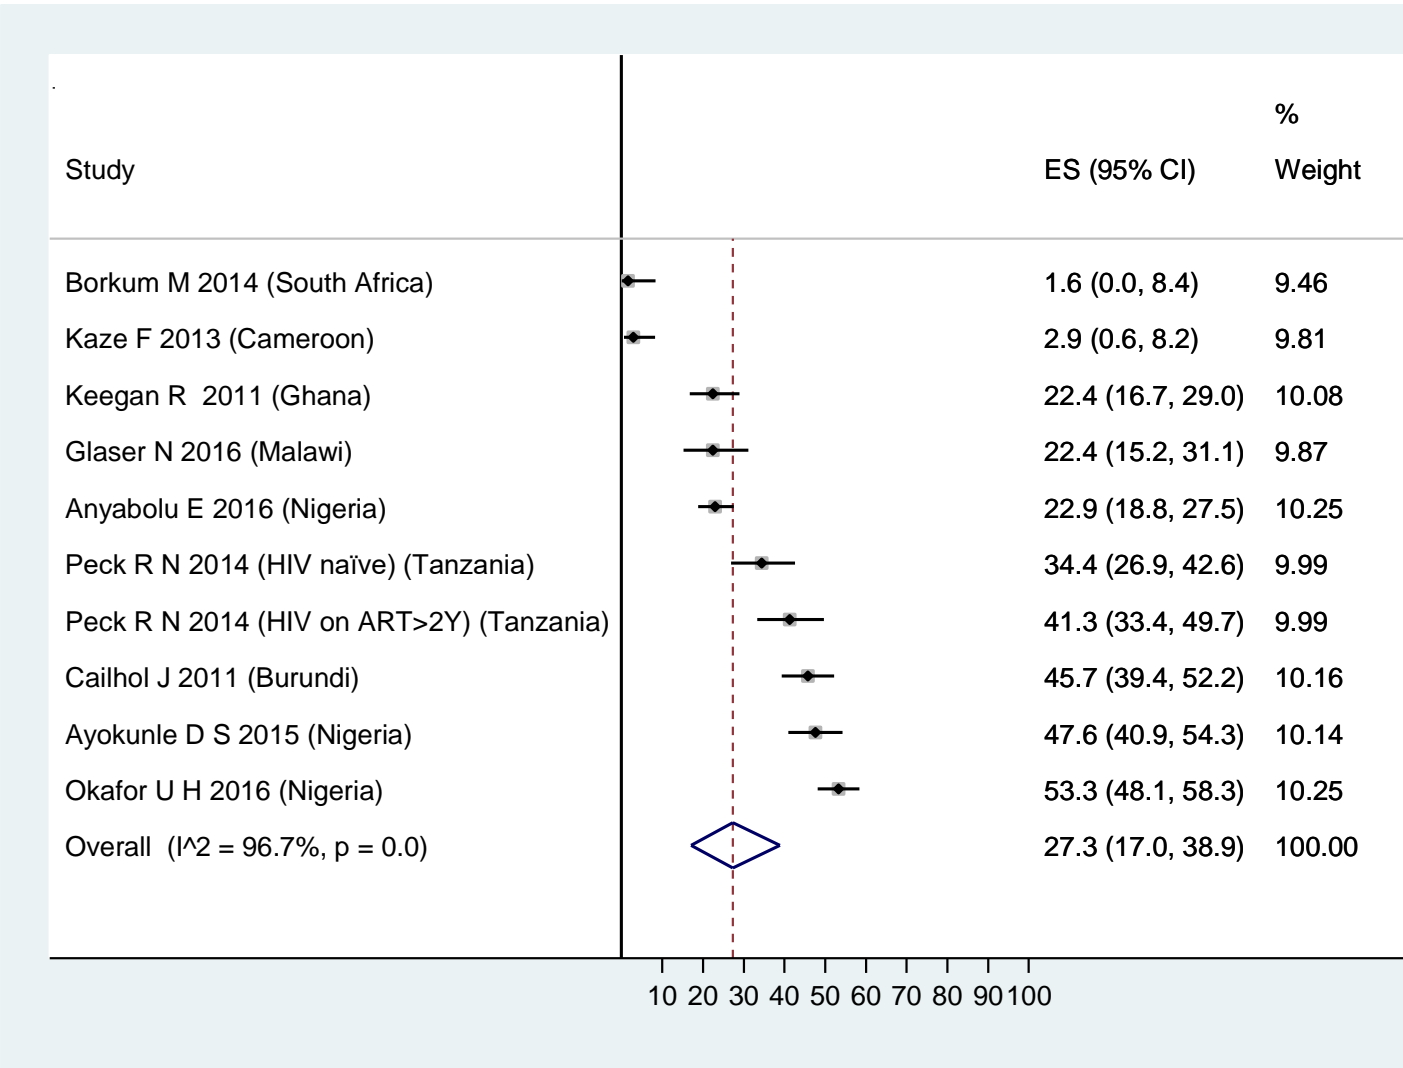

**Figure S3: Prevalence of CKD in HIV-positive individuals living in Africa.** Black boxes represent the effect estimates (prevalence) and the horizontal bars about are for the 95% confidence intervals (CIs). The diamond is for the pooled effect estimate and 95% CI and the dotted vertical line centered on the diamond has been added to assist visual interpretation.

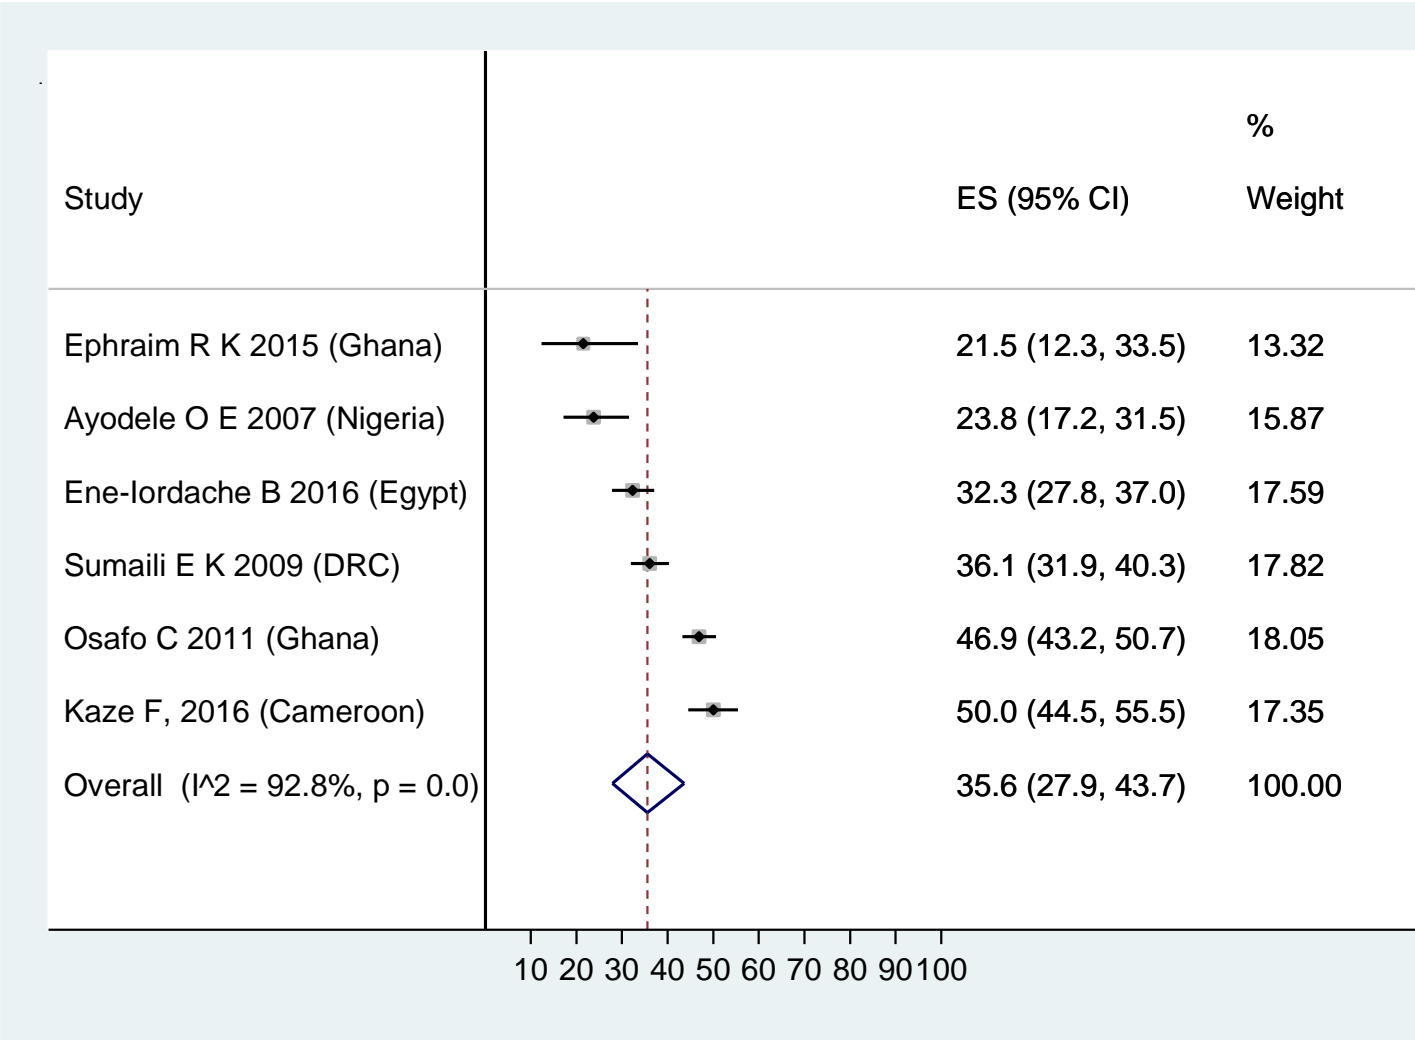

**Figure S4: Prevalence of CKD in hypertensive individuals living in Africa.** Black boxes represent the effect estimates (prevalence) and the horizontal bars about are for the 95% confidence intervals (CIs). The diamond is for the pooled effect estimate and 95% CI and the dotted vertical line centered on the diamond has been added to assist visual interpretation.



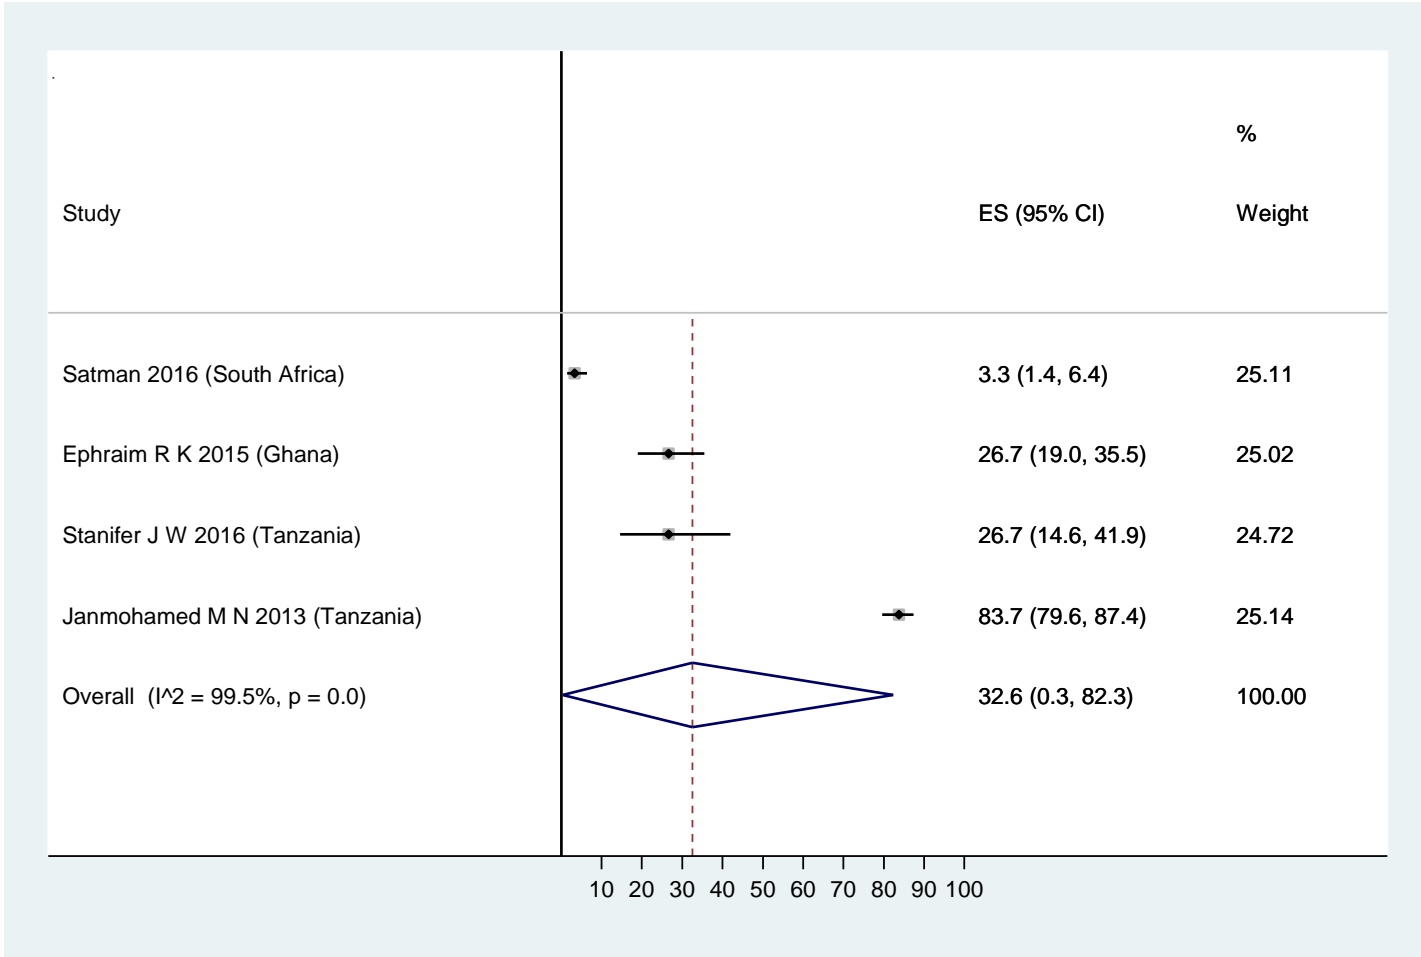

**Figure S5: Prevalence of CKD in people with diabetes mellitus living in Africa.** Black boxes represent the effect estimates (prevalence) and the horizontal bars about are for the 95% confidence intervals (CIs). The diamond is for the pooled effect estimate and 95% CI and the dotted vertical line centered on the diamond has been added to assist visual interpretation.

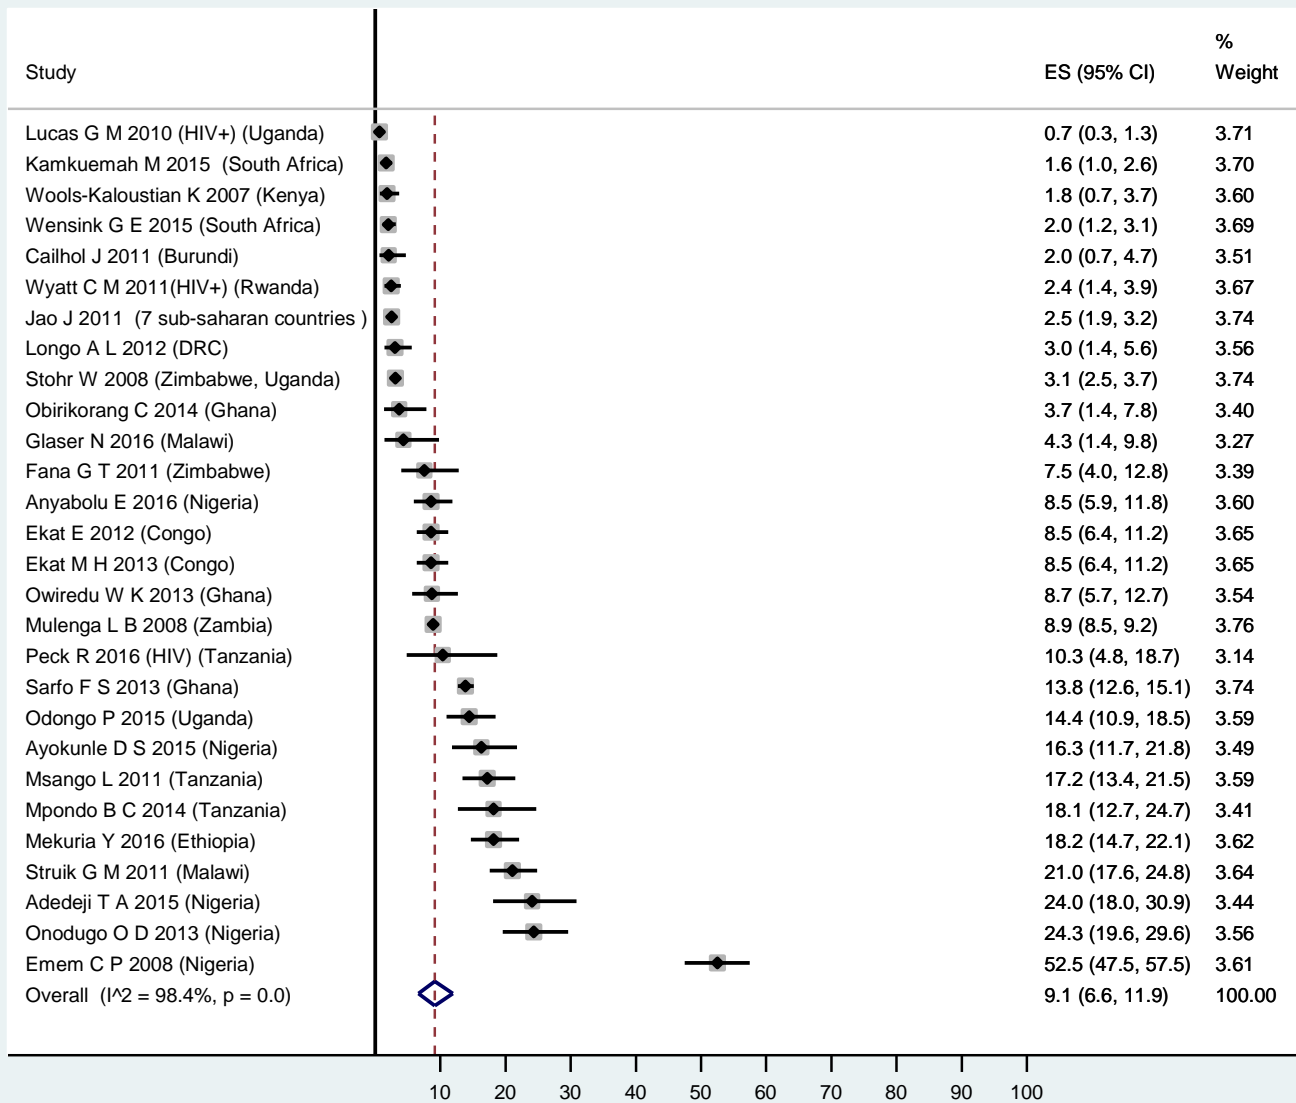

**Figure S6: Prevalence of CKD stages 3 to 5 in HIV-positive individuals living in Africa.** Black boxes represent the effect estimates (prevalence) and the horizontal bars about are for the 95% confidence intervals (CIs). The diamond is for the pooled effect estimate and 95% CI and the dotted vertical line centered on the diamond has been added to assist visual interpretation.

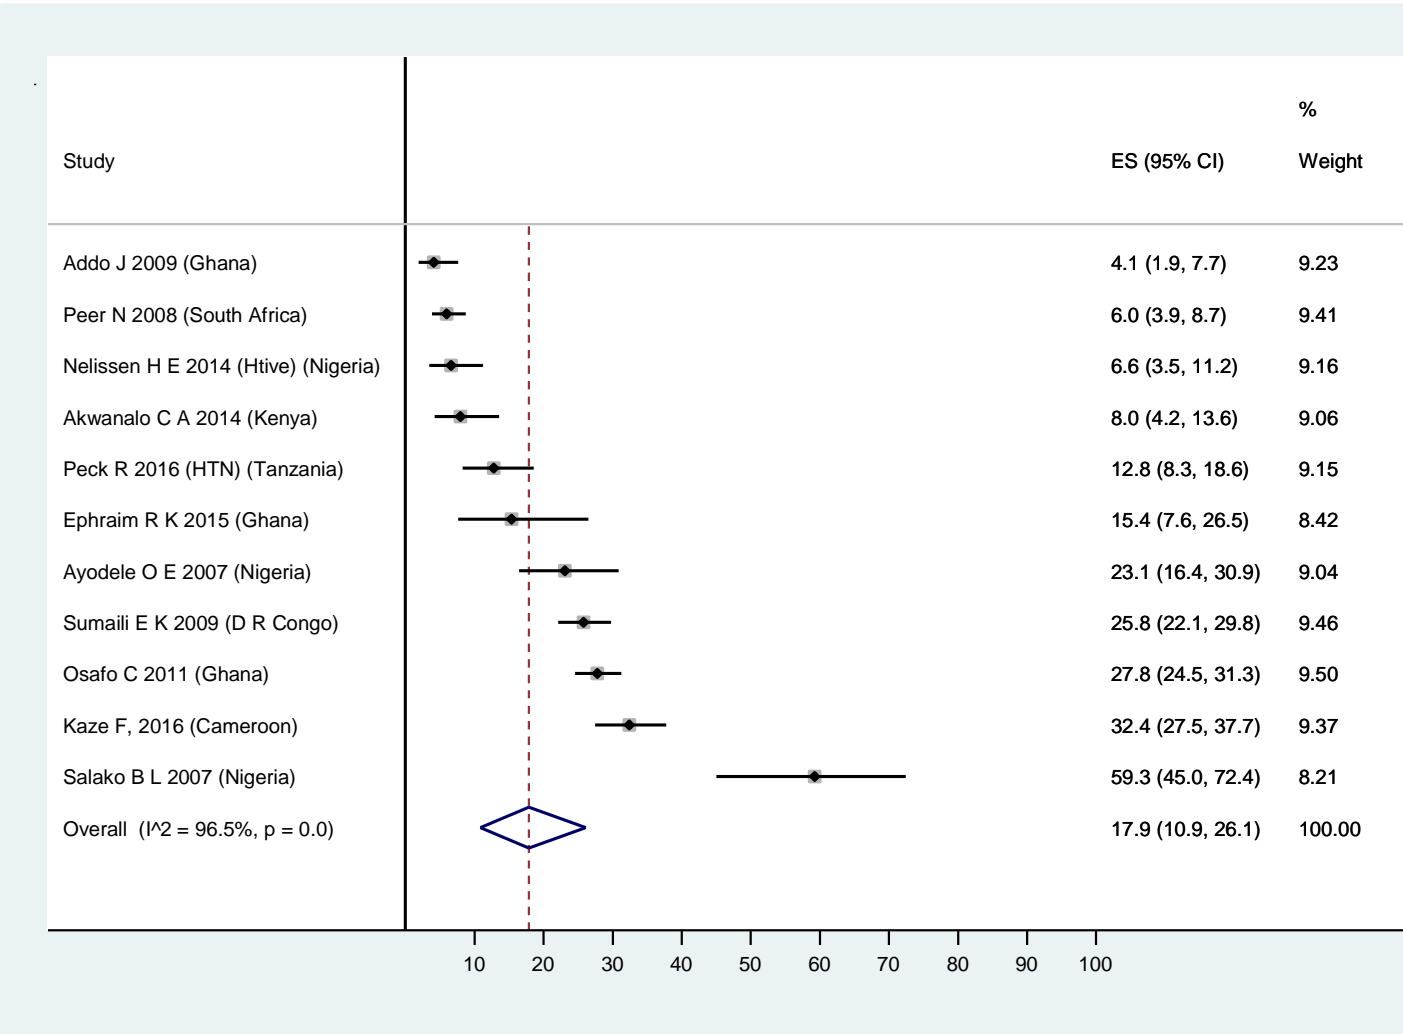

**Figure S7: Prevalence of CKD stages 3 to 5 in hypertensive individuals living in Africa.** Black boxes represent the effect estimates (prevalence) and the horizontal bars about are for the 95% confidence intervals (CIs). The diamond is for the pooled effect estimate and 95% CI and the dotted vertical line centered on the diamond has been added to assist visual interpretation.

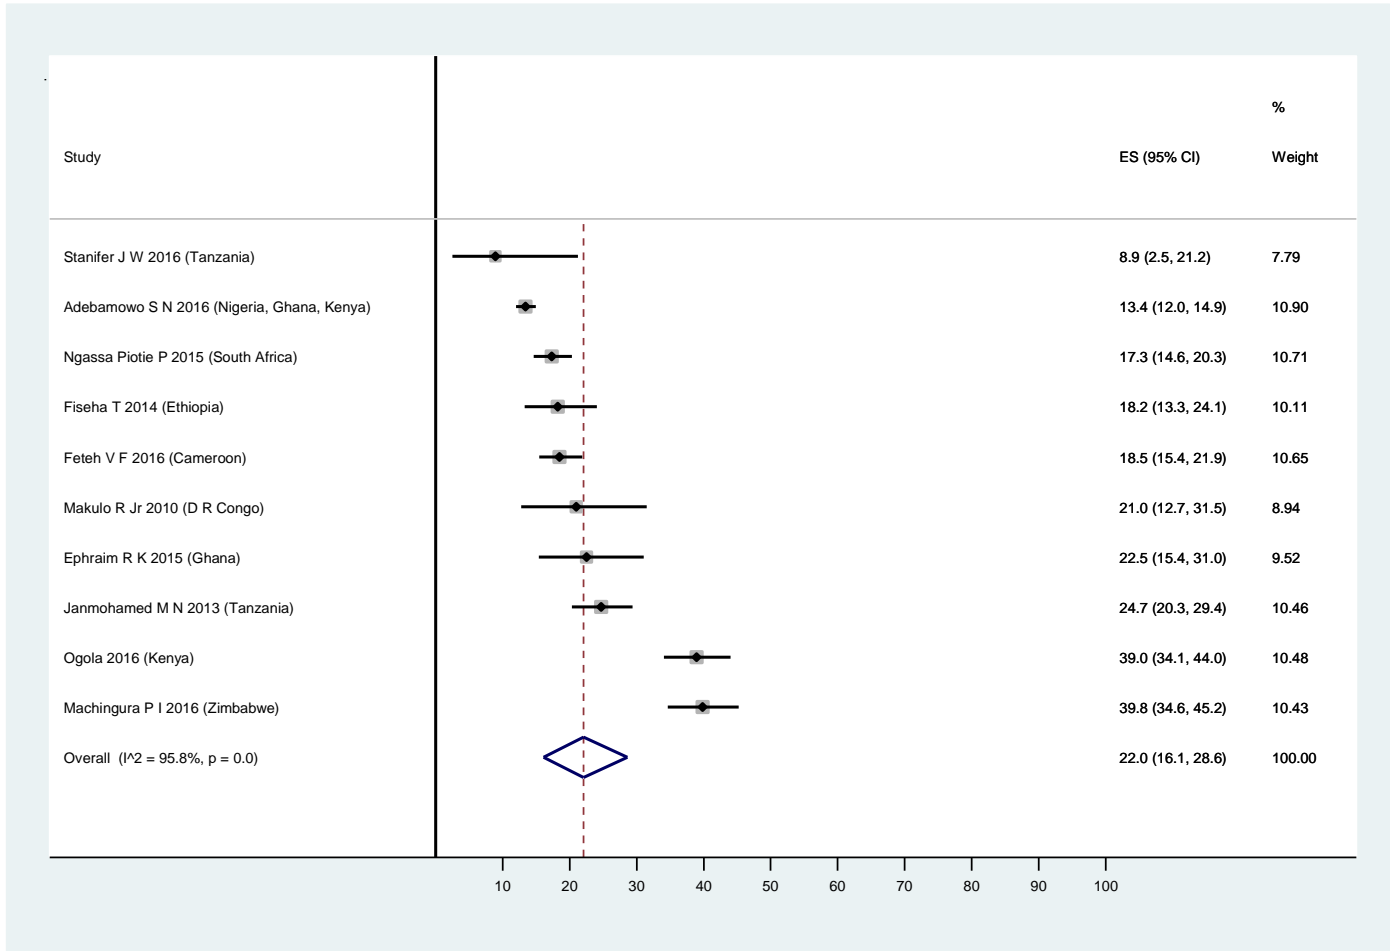

**Figure S8: Prevalence of CKD stages 3 to 5 in people with diabetes mellitus living in Africa.** Black boxes represent the effect estimates (prevalence) and the horizontal bars about are for the 95% confidence intervals (CIs). The diamond is for the pooled effect estimate and 95% CI and the dotted vertical line centered on the diamond has been added to assist visual interpretation.
